1  
2  
3  
4  
5  
6  
7  
8  
9  
10  
11  
12  
13  
14  
15  
16  
17  
18  
19  
20  
21  
22  
23  
24

**Complete Genome Sequence of the *Wolbachia wAlbB*  
Endosymbiont of *Aedes albopictus***

**Amit Sinha<sup>#</sup>, Zhiru Li<sup>#</sup>, Luo Sun, and Clotilde K. S. Carlow<sup>\*</sup>**

**New England Biolabs, Ipswich, Massachusetts, 01938, USA**

**<sup>#</sup>These authors contributed equally to this work.**

25

26 **Running Title:** Genome of *Wolbachia wAlbB*

27 \***Author for correspondence:** Clotilde Carlow, Division of Genome Biology, New

28 England Biolabs, Ipswich, MA 01938. Tel: 978 380 7263, Fax: 978 921 1350, e-mail:

29 [carlow@neb.com](mailto:carlow@neb.com).

30

31 **Data deposition:** Raw data from PacBio sequencing have been deposited in the NCBI SRA

32 database under BioProject accession number PRJNA454708, as runs SRR7784284,

33 SRR7784285, SRR7784286, SRR7784287. The paired-end reads from Illumina library used for

34 indel correction are available from NCBI SRA database as accession SRR7623731. The

35 assembled genome and annotations have been submitted to the NCBI GenBank database with

36 accession number CP031221.

37

38

## 39 **Abstract**

40 *Wolbachia*, an alpha-proteobacterium closely related to *Rickettsia* is a maternally transmitted,  
41 intracellular symbiont of arthropods and nematodes. *Aedes albopictus* mosquitoes are naturally  
42 infected with *Wolbachia* strains *wAlbA* and *wAlbB*. Cell line Aa23 established from *Ae.*  
43 *albopictus* embryos retains only *wAlbB* and is a key model to study host-endosymbiont  
44 interactions. We have assembled the complete circular genome of *wAlbB* from the Aa23 cell  
45 line using long-read PacBio sequencing at 500X median coverage. The assembled circular  
46 chromosome is 1.48 megabases in size, an increase of more than 300 kb over the published draft  
47 *wAlbB* genome. The annotation of the genome identified 1,205 protein coding genes, 34 tRNA,  
48 3 rRNA, 1 tmRNA and 3 other ncRNA loci. The long reads enabled sequencing over complex  
49 repeat regions which are difficult to resolve with short-read sequencing. Thirteen percent of the  
50 genome is comprised of IS elements distributed throughout the genome, some of which cause  
51 pseudogenization. Prophage WO genes encoding some essential components of phage particle  
52 assembly are missing, while the remainder are scattered around the genome. Orthology analysis  
53 identified a core proteome of 536 orthogroups across all completed *Wolbachia* genomes. The  
54 majority of proteins could be annotated using Pfam and eggNOG analyses, including ankyrins  
55 and components of the T4SS. KEGG analysis revealed the absence of 5 genes in *wAlbB* which  
56 are present in other *Wolbachia*. The availability of a complete circular chromosome from  
57 *wAlbB* will enable further biochemical, molecular and genetic analyses on this strain and related  
58 *Wolbachia*.

59

60 **Key words:** Symbiosis, Aa23, mosquito, PacBio, prophage, IS elements

61

## 62 Introduction

63 *Wolbachia* are gram-negative  $\alpha$ -proteobacteria of the order *Rickettsiales*. Maternally  
64 transmitted infections are widespread, occurring in an estimated 40-65% of insect species  
65 (Hilgenboecker et al. 2008; Werren et al. 2008) including 28% of mosquito species (Kittayapong  
66 et al. 2000). *Wolbachia* infections are not limited to arthropods as nematodes, including several  
67 major human pathogens, also harbor the endosymbiont (Fenn et al. 2006; Lefoulon et al. 2016).  
68 Currently, *Wolbachia* strains have been classified as *Wolbachia pipientis* (Hertig 1936; Lo et al.  
69 2007), which has been divided into 16 major phylogenetic clades termed supergroups, denoted  
70 A-Q, mainly on the basis of 16S rDNA phylogenetic analyses. Most supergroups are restricted  
71 to arthropods (A, B, E, G, H, I, K, M, N, O, P and Q) (Lefoulon et al. 2016), whereas  
72 supergroups C and D are the major nematode-infecting lineages. Supergroup F is unique as it  
73 contains both nematode and arthropod-infecting strains (Lefoulon et al. 2016). The nature of the  
74 association between *Wolbachia* strains and their hosts varies greatly. In nematodes, the  
75 prevalence of infection is 100% and the relationship is obligate (Taylor et al. 2005). These  
76 attributes have been exploited to enable the use of antibiotics as a novel approach to treat filarial  
77 infections (Langworthy et al. 2000; Bazzocchi et al. 2008; Johnston et al. 2014). In contrast,  
78 infection is less prevalent in insect hosts and can cause broad effects on insect physiology  
79 leading to several phenotypic changes attributed to the ability of *Wolbachia* to act as  
80 manipulators of the host (Werren et al. 2008; Cordaux et al. 2011). Among these manipulations,  
81 cytoplasmic incompatibility (CI) is the most common phenotype in mosquitoes (Sinkins 2004)  
82 and provides a reproductive advantage to *Wolbachia*-infected females over uninfected females,  
83 resulting in spread and persistence of *Wolbachia* in populations (Xi et al. 2005). When  
84 experimentally transferred to uninfected mosquitoes, *Wolbachia* can also suppress infection or

85 transmission of viruses (Walker et al. 2011; Aliota, Walker, et al. 2016; Aliota, Peinado, et al.  
86 2016; Carrington et al. 2018), *Plasmodium* parasites (Kambris et al. 2010) and filarial nematodes  
87 (Kambris et al. 2009; Andrews et al. 2012) making *Wolbachia* a particularly attractive agent for  
88 control of vector-borne pathogens.

89         The Asian tiger mosquito, *Aedes albopictus*, is an aggressive biting mosquito and  
90 currently one of the most invasive species in the world. Originally native to Southeast Asia, the  
91 species has spread in the past 30-40 years and colonized five continents (Kotsakiozi et al. 2017).  
92 It is a significant public health concern as it is a competent vector of several arboviruses that  
93 cause severe diseases in humans such as dengue, chikungunya and zika (Gratz 2004; Chouin-  
94 Carneiro et al. 2016; Grard et al. 2014). Two distinct *Wolbachia* strains (*wAlbA* and *wAlbB*),  
95 are present in variable density in *Ae. albopictus* tissues (Kittayapong et al. 2000; Zouache et al.  
96 2009). *wAlbB*, belonging to the supergroup B, is a particularly interesting strain to study since it  
97 has been reported to induce opposing phenotypes in different hosts following either malaria or  
98 viral infection. Transient somatic infection of *Anopheles gambiae* with *wAlbB*  
99 inhibits *Plasmodium falciparum* but enhances *Plasmodium berghei* parasites (Hughes et al. 2011,  
100 2012). It enhances West Nile virus infection in the mosquito *Culex tarsalis* (Dodson et al. 2014),  
101 whereas it blocks transmission of dengue (Mousson et al. 2012) and chikungunya (Raquin et al.  
102 2015). The interplay between *wAlbB* and its host is also particularly important as it impacts the  
103 stability of *wAlbB* following its introduction into new hosts such as *Aedes aegypti* mosquitoes to  
104 control dengue and zika transmission to humans (Pan et al. 2018).

105         Cell lines containing *Wolbachia* represent a simplified model in which to explore the  
106 symbiotic relationship and have been used extensively in molecular, biochemical and genetic  
107 studies (O'Neill et al. 1997; Voronin et al. 2012; Saucereau et al. 2017). The Aa23 cell line

108 derived from *Wolbachia*-infected *Ae. albopictus* mosquito embryos was the first cell line  
109 developed to enable studies on *Wolbachia*-host cell interactions (Sinkins et al. 1995; O'Neill et  
110 al. 1997). While *Ae. albopictus* mosquitoes are naturally infected with *wAlbA* and *wAlbB*, only  
111 *wAlbB* was retained in the Aa23 cell line (Sinkins et al. 1995; O'Neill et al. 1997). The cell line  
112 comprises at least two cell types and *Wolbachia* infection varies, with respect to both the level of  
113 infection among individual cells and the overall level of infection in a population (O'Neill et al.  
114 1997). However, high cell density during passaging helps to maintain a relatively stable  
115 infection rate, because the duration of exponential growth is affected by cell density (Gerenday  
116 & Fallon 1996). *wAlbB* from Aa23 cells has been used as a source of infection for other insect  
117 cell lines (Dobson et al. 2002; Fenollar, Scola, et al. 2003; Xi et al. 2005; Rasgon et al. 2006).  
118 Since no nematode-derived cell culture system for *Wolbachia* exists, the Aa23 insect cell  
119 line:*wAlbB* model system has been used as a proxy to screen for new anti-*Wolbachia*/filarial  
120 compounds (Fenollar, Maurin, et al. 2003).

121         Due to the importance of the *wAlbB*-infected Aa23 cell line in studies on symbiosis,  
122 pathogen control and drug screening, a draft genome sequence of this strain was published  
123 (Mavingui et al. 2012). For this *Wolbachia* assembly, Multiple Displacement Amplification of  
124 DNA from infected cells was used to construct a mate-paired library containing 6-kb inserts, and  
125 sequenced with 454 Titanium pyrosequencing at 76 bp read-length. The resulting genome draft  
126 is incomplete with 165 contigs encompassing 49 scaffolds (Mavingui et al. 2012), hampering a  
127 comprehensive analysis of the genome.

128         The short-read technologies, such as 454 and Illumina, cannot easily reconstruct  
129 complete microbial chromosomes, and often produce draft assemblies containing gaps. Pacific  
130 Biosciences (PacBio) SMRT technology produces long reads, some as long as 100 kb, with

131 average raw read lengths >15 kb, making single and continuous assembly possible (Eid et al.  
132 2008). In addition, the PacBio library preparation process does not include an amplification step,  
133 therefore DNA is sequenced as a single molecule in its native form, enabling the detection of  
134 covalent base modifications (Flusberg et al. 2010).

135 In the present study, we have assembled the complete circular genome of *wAlbB* present  
136 in the Aa23 cell line, from long-read PacBio sequencing data at 500X median coverage. The  
137 long reads enabled sequencing over complex repeat regions which have been difficult to resolve  
138 with short-read sequencing. The assembled circular genome is 1,484,007 bp in size, an increase  
139 of 321 kb over the published *wAlbB* draft genome, making it one of the largest sequenced  
140 *Wolbachia* genomes to date. This sequence will serve as important resource for detailed studies  
141 of *wAlbB* and related *Wolbachia*.

142

143

## 144 **Materials and Methods**

### 145 **Cell culture**

146 The Aa23 cell line infected with *wAlbB* was a kind gift from Dr. Stephen Dobson. Cells were  
147 grown in culture flasks at 28°C in equal volumes of Mitsuhashi–Maramorosch medium (Sigma  
148 M9257) and Schneider’s insect medium (Sigma S0146), supplemented with 10% heat-  
149 inactivated fetal bovine serum (O’Neill et al. 1997). The cells retained the morphological  
150 heterogeneity originally described (O’Neill et al. 1997) and were routinely sub-cultured at 7 to  
151 10 day intervals by diluting 1:3 in fresh media to maintain high cell density and contiguous  
152 monolayers.

153

## 154 Immunostaining of *Wolbachia* with anti-VirB8 antibody

155 Cells cultured on glass coverslips within 24-well microtiter plates were fixed in 4%  
156 formaldehyde in phosphate-buffered saline (PBS) for 15 min and subsequently permeabilized  
157 using chilled 100% methanol (-20°C) for 1 min. Fixed cells were then incubated in polyclonal  
158 rabbit anti-VirB8 antibody (Li & Carlow 2012) diluted 1:2,000 in PBS containing 5% goat  
159 serum, followed by Alexa Fluor 488 (green) conjugated goat anti-rabbit secondary antibodies  
160 (Molecular Probes; Invitrogen Life Technologies) according to manufacturer's instructions. Cell  
161 nuclei were stained with Hoechst 33342 at 1:10,000 dilution in PBS. Prolong Gold anti-fade  
162 reagent (Invitrogen Life Technologies) was used to avoid fading. Images were acquired using an  
163 Axiovert 200M microscope (Carl Zeiss, Oberkochen, Germany) and processed using ZEN  
164 software (Carl Zeiss).

165

## 166 DNA extraction

167 To harvest host cell-free *w*AlbB, spent culture media from Aa23 cells (passage #65) was  
168 collected and centrifuged at 500g to remove cell debris, followed by 5,000g to collect the  
169 *Wolbachia*-enriched pellet. Genomic DNA was extracted using a Qiagen MagAttract HMW kit  
170 following manufacturer's instructions. Briefly, 220uL of buffer ATL and 20uL of proteinase K  
171 were added, and the sample was incubated at 56°C for 3 hours with mixing at 900 rpm  
172 (Eppendorf thermomixer C). DNA was eluted with 150uL of AE buffer and quantified using a  
173 NanoDrop and Qubit instruments (Thermo Fisher Scientific). The quality of DNA was assessed  
174 using an Agilent 4200 TapeStation System. The DNA obtained was good quality (DIN > 8.2),  
175 and high molecular weight, larger than 60 kb in size (Supplementary Figure S1).

176



## 177 PacBio and Illumina library construction and sequencing

178 For library construction, intact genomic DNA was fragmented using a Megaruptor 2 device  
179 (Diagenode). Sheared DNA was purified with AMPure PB beads and 2 $\mu$ g were used to  
180 construct a SMRTbell library according to PacBio library construction guidelines with some  
181 modifications. Briefly, sheared DNA was repaired using the NEBNext FFPE DNA Repair Mix,  
182 followed by end-repair to generate blunt ends. Following purification using AMPure PB beads,  
183 PacBio universal hairpin adaptors were ligated to the DNA to produce SMRTbell libraries. After  
184 adaptor removal and library clean up, concentration and size of the SMRTbell library were  
185 determined using the Qubit HS DNA kit and Agilent TapeStation analysis. To enrich for longer  
186 insert sizes, size selection was performed using the BluePippin system (Sage Science), resulting  
187 in a library that contained an insert size of approximately 45 kb (Supplementary Figure S1). The  
188 PacBio sequencing primer was then annealed to the SMRTbell library followed by binding of the  
189 polymerase to the primer-library complex. The size-selected library was loaded onto 2 SMRT  
190 cells in the PacBio RSII system using a MagBead binding kit and sequenced with a 300 minutes  
191 collection time. Two additional SMRT cells were loaded with library that did not undergo size  
192 selection.

193 For Illumina library construction, genomic DNA was fragmented to 300 bp average size  
194 using a Covaris S2 (Covaris Inc.) with the following settings: 10% duty cycle, intensity 4,200  
195 cycles per burst and treatment time of 80 seconds. Libraries were constructed using the  
196 NEBNext Ultra II DNA Library Prep Kit for Illumina (New England Biolabs, Inc.). The library  
197 quality was assessed using a high sensitivity DNA chip on a Bioanalyzer (Agilent Technologies,  
198 Inc.). The library was sequenced on an Illumina MiSeq platform (paired-end, 150 nt reads).

199

## 200 Genome Assembly and DNA modification analysis

201 PacBio sequencing reads from all 4 flow cells were processed and assembled using the HGAP  
202 assembler version 3 (Chin et al. 2013) as implemented in the PacBio SMRT® Analysis Server  
203 v2.3.0 (<https://www.pacb.com/products-and-services/analytical-software/smrt-analysis>). The  
204 contig corresponding to *wAlbB* was selected for further polishing and circularization.  
205 Overlapping regions at the termini of this contig were identified by BLAST analysis, and were  
206 merged to circularize the chromosome. This circular draft assembly sequence was further  
207 polished using multiple rounds of the ReSequencing.1 protocol from the PacBio SMRT®  
208 Analysis Server v2.3.0. The origin of replication, *oriC*, was identified by generating a consensus  
209 of all 10 *Wolbachia oriC* sequences obtained from the DoriC database (Gao et al. 2013). The  
210 assembled chromosome was verified to be free of any structural errors via the RS.Bridgemapper  
211 pipeline available as a part of the PacBio SMRT portal.

212 The validity and correctness of chromosome circularization was confirmed by PCR and  
213 sequencing across the ends of the polished chromosome.  
214 Primers F1 (5'TCCCCTGCCCTACCTGAGTA3') and R1  
215 (5'GTCATCATCCTGCGCGAGAG3') were used to amplify a 1,599 bp fragment that spans the  
216 junction of circularization; primers F2 (5' TGTTGCTTTCATTGAGGCTGGT3') and R2 (5'  
217 TATTGGACCCACACCGCGAA3') were used to amplify a 1081bp fragment to verify the *oriC*  
218 sequence, using the Q5 HiFi PCR master mix (NEB M0543) following manufacturer's  
219 instructions. Search for potential DNA modifications in the *Wolbachia wAlbB* genome was  
220 carried out using the polished genome as a reference genome in the

221 RS\_Modification\_and\_Motif\_Analysis.1 pipeline from the PacBio SMRT® Analysis Server  
222 v2.3.0.

223 To check and correct any potential indel errors typically observed in PacBio-only  
224 assemblies (Watson 2018), Illumina sequencing was performed. After adapter-trimming and  
225 filtering of low quality reads using BMAP package, version 37.17  
226 (<https://sourceforge.net/projects/bbmap>), the reads were mapped to the PacBio chromosome  
227 using bwa version 0.7.15-r1140 (Li & Durbin 2009) in paired-end mode. Pilon software version  
228 1.22 (Walker et al. 2014) was run on the bam file output from bwa, using alignments with  
229 mapping quality  $\geq 20$  (Pilon flag minmq=20).

230

### 231 Genome annotation and analysis

232 Protein-coding genes, rRNA, tRNA, ncRNA and pseudogenes were identified using the NCBI  
233 prokaryotic annotation pipeline (Angiuoli et al. 2008). Further functional annotation of protein-  
234 coding genes was carried out using the eggNOG-Mapper (Huerta-Cepas et al. 2017) web server  
235 (<http://eggnogdb.embl.de/#/app/emapper>) against the eggNOG database (Huerta-Cepas et al.  
236 2016). The completeness of the genome was assessed using the BUSCO pipeline version 3.0.2  
237 (Simão et al. 2015). Insertion sequence (IS) elements were identified by searching against the  
238 ISfinder database (Siguier et al. 2006) via the ISSaga web server (Varani et al. 2011) available at  
239 [http://issaga.biotoul.fr/issaga\\_index.php](http://issaga.biotoul.fr/issaga_index.php). Pfam domains were annotated using the pfam\_scan.pl  
240 script version 1.6 from <http://ftp.ebi.ac.uk/pub/databases/Pfam/Tools> to search against Pfam  
241 database version 31.0 (Finn et al. 2016). Annotation of integrated prophage regions was carried  
242 out using the PHASTER web server (Arndt et al. 2016), available at <http://phaster.ca>, and by  
243 comparisons to other *Wolbachia* prophage sequences. These include WOVitA1 (GenBank:

244 HQ906662.1), WOCauB2 (GenBank: AB478515.1) and WOCauB3 (GenBank: AB478516.1),  
245 WOVitB (GenBank: HQ906665.1, HQ906666.1) and the prophage regions from *wMel*  
246 (GenBank: NC\_002978.6). Circos plots (Krzywinski et al. 2009) for visualizing the distribution  
247 of various features across the genome were plotted using the R package *circlize*, version 0.4.3  
248 (Gu et al. 2014). Search for orthologs across multiple genomes was performed using the  
249 OrthoFinder (Emms & Kelly 2015) software version 1.1.4. The number of orthogroups common  
250 across various *Wolbachia* were visualized as UpSet plots (Lex et al. 2014) using the R package  
251 UpSetR, version 1.3.3 (Conway et al. 2017).

252 KEGG automatic annotation server, KAAS, (Moriya et al. 2007), available online at  
253 <https://www.genome.jp/kegg/kaas>, was used to find functional annotations of genes in the  
254 *wAlbB* genome. *wAlbB* protein sequences were used as query sequences and blast (bi-  
255 directional best hit) searched against a manually curated set of ortholog groups in KEGG to  
256 generate KEGG pathways and functional classifications. The KO assignments of *wAlbB*  
257 proteins from KEGG pathway analysis were then compared to the KEGG pathways of  
258 *Wolbachia wRi* from *Drosophila simulans* and *wPip* from *Culex quinquefasciatus* available in  
259 the KEGG database, to identify any missing proteins in *wAlbB*.

260

261

## 262 **Results**

263 *High levels of Wolbachia infection enable production of host cell-free Wolbachia*

264 To preserve high levels of *Wolbachia* infection in Aa23 cells, maintenance of a high-density  
265 monolayer of cells was found to be necessary, which was achieved by passaging at high cell  
266 densities. Approximately 80% of cells were infected with a high *Wolbachia* load as verified by

267 staining with an  $\alpha$ -virB8 antibody (Figure 1A) or a Hoechst 33342 DNA dye (Figure 1B). The  
268 large numbers of host cell-free *Wolbachia* observed in spent culture media (Figure 1C), obviated  
269 the need for further separation of *Wolbachia* from host cells.

270

## 271 Assembly and Annotation

272 Processing of the combined PacBio data obtained from 4 SMRT cells produced 944,546 filtered  
273 subreads and a total of 3 billion bases, with the longest subread at 61 kb and median length 3.4  
274 kb. HGAP3 assembly of this data generated 581 contigs. The longest contig was 1,511,710 bp,  
275 at ~500X median coverage (Supplementary Figure S1) and 99.9994% consensus concordance.  
276 This single contig contained all the contig sequences from the published *wAlbB* assembly  
277 (RefSeq assembly accession GCF\_000242415.2), and was selected for further polishing. No  
278 other contig matched the *wAlbB* genome. One contig at 2,400X median coverage corresponded  
279 to *Ae. albopictus* mitochondrial DNA, and the remaining contigs mostly matched *Ae. albopictus*  
280 genomic regions.

281 A BLAST analysis of the *wAlbB* contig to itself identified a highly similar 27 kb region  
282 repeated at the beginning and end of the contig, indicating that this contig represents the  
283 complete circular chromosome. To validate that these regions (marked A1 and A2 in Figure 2A)  
284 represent overlapping ends of the circular chromosome, we collapsed them into a single  
285 consensus region (marked A in Figure 2A-B). Using the PacBio ReSequencing.1 pipeline, all  
286 sequencing reads were re-mapped to this corrected chromosome sequence, which generated a  
287 polished single contig representing a circular chromosome with non-repeating ends. Primers F1  
288 and R1 (Figure 2A-B) designed to span this candidate junction of circularization produced a PCR  
289 product of expected size of 1.5 kb (Figure 2C) and sequence, confirming the correctness of the

290 circularization. For the next round of polishing, the first base of the chromosome sequence was  
291 reset to the start of *oriC* and this permuted sequence was again used as a reference for re-  
292 mapping all the reads using the PacBio ReSequencing.1 pipeline. The sequence of the *oriC*  
293 region was also verified by sequencing the PCR product generated using primers F2 and R2  
294 (Figure 2A-C). The final polished circular genome produced as the output had a median  
295 coverage of ~500X and was used in all subsequent analysis. The identified *wAlbB oriC* has all  
296 the hallmark features typical of *Wolbachia oriC* regions (Ioannidis et al. 2007). It is flanked by  
297 *hemE* and *tlyC* genes, with the intergenic regions having binding sites for DnaA, IHF and CtrA  
298 (Figure 2D).

299 Indel errors are sometimes observed in assemblies produced from only long-read  
300 technologies such as PacBio or Nanopore (Watson 2018). Therefore, the polished, circular  
301 *wAlbB* genome was checked for any potential errors using Illumina reads. About 4.8 million  
302 paired-end reads mapped to the assembly (mapping quality  $\geq 10$ ) providing a ~630X median  
303 coverage of the genome and were used as an input to the Pilon error-detection and correction tool  
304 (Walker et al. 2014). This analysis did not identify any indels, but 65 potential single nucleotide  
305 polymorphisms (SNPs). However, these SNPs have very low quality scores and low coverage  
306 (~2X coverage as opposed to a median coverage of ~630X at all other positions) and therefore  
307 did not pass the filter for making changes. In summary, no errors were detected in the PacBio  
308 assembly based on the Pilon analysis using high-quality and high coverage Illumina read  
309 alignments. This indicates that the median PacBio coverage of ~500X and multiple rounds of  
310 polishing using the PacBio ReSequencing.1 pipeline was sufficient to produce an accurate  
311 assembly.

312 The final circular chromosome is 1,484,007 bp in size (Table 1), an increase of 321 kb  
313 over the published *wAlbB* draft genome. Using the nucmer tool for genome alignments (Kurtz et  
314 al. 2004), all the contigs from the published genome (Mavingui et al. 2012) could be mapped to  
315 the complete assembly (Figure 3A). The regions common between the complete genome and the  
316 previously published draft assembly share > 99% sequence identity. The average GC content of  
317 the genome is 34.4 %, which is within the typical range for *Wolbachia* genomes (Table 1).  
318 Analysis with RS\_Modification\_and\_Motif\_Analysis.1 pipeline did not identify DNA  
319 modifications such as m4C or m6A suggesting that these modifications are absent from the  
320 *wAlbB* genome (Figure S2).

321 Annotation of the genome using the NCBI prokaryotic annotation pipeline (Angiuoli et  
322 al. 2008) identified 1,205 protein-coding genes, an increase of 250 genes over the published  
323 version. The genome also encodes 34 tRNA genes that include cognates for all amino acids, 3  
324 rRNA (16S, 23S, and 5S), plus another 3 non-coding RNAs (6S RNA, RNase P RNA, and a  
325 signal recognition particle sRNA small type) and one tmRNA gene. A total of 188 pseudogenes  
326 were identified resulting from one or more of the following causes: frameshift (n = 39),  
327 incomplete (n = 150), internal stop (n = 23) or multiple problems (n = 21). The percentage of  
328 pseudogenes is comparable across all the completed *Wolbachia* genomes from various  
329 supergroups (Table 1).

330 The completeness of genome annotation was evaluated using the Benchmarking  
331 Universal Single-Copy Orthologs (BUSCO) pipeline (Simão et al. 2015), which measures the  
332 proportion of expected gene content from highly conserved, single-copy orthologs (BUSCO  
333 groups). The analysis was carried out against 221 BUSCO groups derived from 1,520  
334 proteobacterial species. The 1,205 protein coding genes in the *wAlbB* genome contain 179

335 complete and single copy BUSCO groups, 2 complete and duplicated BUSCO groups, 6  
336 fragmented BUSCOs and 34 missing BUSCOs, resulting in a 81% BUSCO completeness score.  
337 For comparison, the BUSCO scores were also calculated for the other completed *Wolbachia*  
338 genomes (Figure S3) and similar completeness scores were obtained for all genomes analyzed  
339 (Table 1).

340

### 341 Insertion Sequence (IS) elements comprise 13% of the *wAlbB* genome

342 Insertion sequences are one of the simplest transposable elements, usually encoding only a  
343 transposase flanked by short direct- or inverted- repeats, and can play a major role in genome  
344 evolution even in a short time scale (Siguier et al. 2015). IS elements have been classified into  
345 ~20 families based on sequence similarities (Siguier et al. 2006). *Wolbachia* genomes often  
346 harbor numerous IS elements and their identification is essential for a comprehensive study of  
347 *Wolbachia* genome evolution (Cerveau et al. 2011). To annotate IS elements in the *wAlbB*  
348 genome, the ISSaga web service (Varani et al. 2011) was used to query the ISfinder database  
349 (Siguier et al. 2006) and 218 IS elements were found distributed throughout the genome (Figure  
350 3A, Table S3), including 45 partial IS elements containing pseudogenized transposase (Table  
351 S3). The IS982 and IS481 family IS elements were the most abundant, with 96 and 75 copies  
352 respectively. The median size for IS elements is 873 bp, and they range in length from 66 bp to  
353 1,683 bp, adding up to total of 191,182 bp or about 13% of the entire *wAlbB* genome. Mapping  
354 the contigs from the published draft genome (Mavingui et al. 2012) to the completed genome  
355 revealed that break points and/or gaps overlap with IS elements (Figure 3A). This indicates that  
356 the repetitive nature of IS elements hinder genome assembly using short-read data, and this  
357 problem can be overcome by using long-read technologies such as PacBio.



358 Movement of IS elements can cause insertions/deletions in a genome, sometimes leading  
359 to pseudogene formation. For example, the published contig NZ\_CAGB01000139.1 (17, 533  
360 bp) was found to map to two regions of ~540 bp and ~17,000 bp on the complete genome, with a  
361 1,203 bp insertion caused by an IS481 element, resulting in the formation of 2 pseudogenes  
362 (DEJ70\_01295, DEJ70\_01305) derived from the *rsmD* gene. PCR amplification and Sanger  
363 sequencing across this region confirmed this insertion and pseudogenization of the *rsmD* gene.

364

## 365 Orthology analysis and identification of a core proteome across completed

### 366 *Wolbachia* genomes

367 Orthology relationships between the *wAlbB* proteins and the RefSeq protein sequences from all  
368 other complete *Wolbachia* genomes (Table 1) were analyzed using OrthoFinder program, which  
369 identifies families of homologous proteins and assigns them to orthogroups (Emms & Kelly  
370 2015). A total of 1,604 orthogroups were derived from a combined set of 13,002 proteins (Table  
371 S4). Of these, 1,171 orthogroups comprised of 12,569 proteins are shared by 2 or more genomes  
372 (“shared orthogroups”), while the remaining 433 orthogroups are unique to each *Wolbachia*  
373 analyzed (Table S4). For *wAlbB*, 1,192 of the 1,205 protein-coding genes (99%) were assigned  
374 to 918 shared orthogroups, while 13 *wAlbB* proteins could not be assigned to any such group  
375 (Table S4). Similarly, for all the other genomes analyzed, more than 93.5% of proteins could be  
376 assigned to a shared orthogroup, and the proportion of potentially genome-specific orthogroups  
377 was found to be low (up to 6.5%). The only outlier was *wFol*, with 14% of its 1,403 proteins not  
378 be assigned to any shared orthogroup (Table S4).

379 The core proteome, defined as the set of proteins present in all genomes analyzed,  
380 consists of 536 orthogroups (Figure 4), and 519 of these orthogroups contain single-copy 1:1

381 orthologs (Table S4). Outside the core proteome, the number of shared orthologous groups  
382 decreased substantially (Figure 4).

383

### 384 Pfam and eggNOG annotations

385 Analysis of Pfam protein domains (Finn et al. 2016) encoded in the *wAlbB* genome identified  
386 995 genes encoding proteins containing at least one Pfam domain, representing 83% of the total  
387 genes present (Table S1). By far the most abundant domains arise from mobile genetic elements.  
388 For example, the DDE Transposase domain (“DDE\_Tnp\_1\_3”, Pfam accession PF13612) was  
389 the most abundant domain, present in 82 proteins, followed by the “Retroviral Integrase” domain  
390 (“rve”, Pfam accession PF00665) present in 67 proteins. We also found 48 proteins containing  
391 the reverse transcriptase domain (“RVT\_1”, Pfam accession PF00078), and 53 proteins with the  
392 Group II intron reverse transcriptase domain (“GIIM”, Pfam accession PF08388). Further  
393 annotation of gene function based on orthology using the eggNOG software (Huerta-Cepas et al.  
394 2017) could assign a putative function to 1,044 (87%) of the 1,205 *wAlbB* protein-coding genes,  
395 with transposase, integrase, and reverse transcriptase functions again being the most abundant  
396 classes.

397

### 398 *wAlbB* genome contains degenerated WO prophage

399 Prophages play an important role in *Wolbachia* biology e.g. the prophage WO from the  
400 *Wolbachia* strain *wMel* contributes to the cytoplasmic incompatibility in its *Drosophila* host  
401 (Masui et al. 2000, 2001; LePage et al. 2017; Beckmann et al. 2017). Availability of a complete  
402 genome made the search for any potential prophages in *wAlbB* feasible. The PHASTER  
403 webserver (Arndt et al. 2016) identified two prophage derived regions in the *wAlbB* genome.

404 The larger prophage region is 15.4 kb in size and showed highest nucleotide similarity to the  
405 WOVitA1 prophage. Further BLAST and OrthoFinder analysis identified *wAlbB* orthologs for  
406 40 of the 63 WOVitA1 genes, and 7 pseudogenes corresponding to 5 other WOVitA1 genes,  
407 while 18 WOVitA1 genes were found to be completely absent in the *wAlbB* genome (Table S5).  
408 The prophage genes absent in *wAlbB* include the components essential for a phage particle  
409 assembly, such as tail subunit I, baseplate subunits J, W and V, phage portal protein and phage  
410 minor capsid protein, suggesting an inactive prophage. Further, the prophage derived genes  
411 (Figure 3B, Table S5) are located in 3 separate clusters in the *wAlbB* genome containing 14, 16  
412 and 8 genes respectively, while the remaining prophage genes are distributed over the genome.  
413 In addition, 5 genes and 6 pseudogenes that are more similar in sequence to prophage genes in  
414 *wMel* rather than WOVitA1 were identified (Table S5). None of these additional 5 genes can  
415 compensate for functions missing in WOVitA1 derived prophage regions. Overall, the combined  
416 size of all prophage derived regions in *wAlbB* genome is 49.8 kb, comprising 3.3 % of the entire  
417 genome. Together these observations suggest that the prophages in *wAlbB* have undergone  
418 degeneration and are not active.

419

## 420 CI genes in *wAlbB*

421 The *wAlbB Wolbachia* is known to cause cytoplasmic incompatibility (CI) in its *Ae. albopictus*  
422 host (Dobson et al. 2001). Genetic studies of CI in *Drosophila* hosts have identified a pair of  
423 genes, *cifA* and *cifB* (LePage et al. 2017; Beckmann et al. 2017), which are sometimes located  
424 within the WO prophage regions (Lindsey et al. 2018). A phylogenetic analysis of *cifA* and *cifB*  
425 across all *Wolbachia* has found them to co-occur as a pair of neighboring genes, and grouped  
426 them into four and three monophyletic “Types” respectively (LePage et al. 2017; Lindsey et al.

427 2018). A search for *cifA* and *cifB* homologs in *wAlbB* identified two sets of *cifA* and *cifB* gene-  
428 pairs. The first pair is composed of a Type IV *cifA* (DEJ70\_02760) and a Type III *cifB*  
429 (DEJ70\_02755), while the second pair is composed of a Type III *cifA* (DEJ70\_07090) and a  
430 Type III *cifB* (DEJ70\_07095). Interestingly, neither of these gene pairs are located in the  
431 prophage derived regions in *wAlbB* (Figure 3B), suggesting that they do not always need to be  
432 encoded in a prophage and can possibly be integrated into *Wolbachia* genomes.

433

#### 434 Type IV secretion system in *wAlbB*

435 Many symbiotic and pathogenic intracellular bacteria use a type IV secretion system (T4SS) for  
436 successful infection, proliferation and persistence within hosts. It is a diverse and versatile  
437 transporter system which spans the entire cell envelope functioning in conjugation, competence  
438 and effector molecule (DNA and/or protein) translocation (Grohmann et al. 2018). Genome  
439 analysis of *wAlbB* revealed the presence of a T4SS with 15 components organized in two  
440 operons and 4 individual genes (Figure 3B). Operon 1 contains *virB8-1* (DEJ70\_04590), *virB9-*  
441 *1* (DEJ70\_04585), *virB10* (DEJ70\_04580), *virB11* (DEJ70\_04575) and *virD4* (DEJ70\_04570).  
442 The vitamin B2 biosynthetic enzyme *ribA* encoded by DEJ70\_04595, may be co-transcribed in  
443 this operon as observed in *wBm* (Li & Carlow 2012). Operon 2  
444 contains *virB3* (DEJ70\_01260), *virB4* (DEJ70\_01265), *virB6-1* (DEJ70\_01270), *virB6-2*  
445 (DEJ70\_01275), *virB6-3* (DEJ70\_01280) and *virB6-4* (DEJ70\_01285). Three duplicated  
446 genes: *virB4-2* (DEJ70\_01565), *virB8-2* (DEJ70\_03190) and *virB9-2* (DEJ70\_06825) are found  
447 scattered elsewhere in the genome. Interestingly, *virB2* (DEJ70\_04445), which has been  
448 presumed absent from *Wolbachia* (Rancès et al. 2008), was also found in the *wAlbB* genome.  
449 Previous studies in other bacteria have shown that the T4SS is not constitutively expressed but

450 tightly regulated by transcription factors (Félix et al. 2008), such as *wBmxR1* and *wBmxR2* in  
451 *wBm* (Li & Carlow 2012). In *wAlbB* one corresponding homolog, *DEJ70\_05760*, with higher  
452 sequence similarity to *wBmxR1* was found.

453

#### 454 Analysis of Ankyrin genes

455 Ankyrin repeat-containing (ANK) proteins are involved in protein–protein interactions and are  
456 rare in bacteria, but are found in *Wolbachia*, where they may be involved in host–*Wolbachia*  
457 interactions. The T4SS has been shown to be responsible for the secretion of the ankyrin repeat-  
458 containing protein AnkA in *Anaplasma phagocytophilum* (Lin et al. 2007), an intracellular  
459 bacterium closely related to *Wolbachia*. Based on genome-wide Pfam protein domain  
460 annotations (Table S1), 34 *wAlbB* proteins were found to contain at least one copy of an ankyrin  
461 repeat domain (Table 1), with a total of 81 copies of various types of ankyrin domains (Table  
462 S1). The same analysis performed for all complete *Wolbachia* genomes revealed a similar  
463 number of ANK proteins across insect *Wolbachia*, and fewer ANKs in filarial *Wolbachia* (Table  
464 1).

465

#### 466 Identification of missing genes in *wAlbB* through KEGG pathway analysis

467 KAAS (KEGG Automatic Annotation Server) (Moriya et al. 2007) was used to obtain functional  
468 annotations of predicted protein sequences from the *wAlbB* genome. A total of 595 proteins  
469 were assigned a KO (KEGG Orthology) number. The KEGG pathway map and KO assignments  
470 for *wAlbB* were compared to those from the closely related *Wolbachia wPip* and *wRi*. Pairwise  
471 comparisons (*wAlbB* versus *wPip*, *wAlbB* versus *wRi*) of the KEGG annotated proteins revealed  
472 5 proteins absent in *wAlbB*, namely DNA-3-methyladenine glycosylase (MPG, EC: 3.2.2.21),

473 diacylglycerol kinase (DgkA, EC: 2.7.1.107), Cytochrome bd ubiquinol oxidase subunit I  
474 (CydA, EC: 1.10.3.14) and subunit II (CydB, EC: 1.10.3.14) and FtsI (EC: 3.4.6.4). The  
475 presence of these 5 proteins was determined in other *Wolbachia* genomes available in the KEGG  
476 database, namely *wMel*, *wRi*, *wHa*, *wNo*, *wPip*, *wBm*, *wOo* and *wCle* (Table 2). MPG was found  
477 in all other *Wolbachia* analyzed except in *wAlbB*, while the other 4 proteins were absent in  
478 *wAlbB* and in at least one additional species (Table 2).

479

480

## 481 **Discussion**

482 We have assembled the complete genome of *wAlbB* from Aa23 cells. The key factors  
483 facilitating this were the relatively pure high molecular weight DNA extracted from host cell-  
484 free *Wolbachia*, and long read PacBio sequencing at high coverage.

485 The long reads enabled sequencing over complex repeat regions which have been  
486 difficult to resolve with short read sequencing. High depth of coverage (~500X) enabled  
487 multiple rounds of polishing of the assembly to remove any SNPs or indel errors that are  
488 occasionally observed in technologies such as PacBio or Nanopore (Watson 2018). Absence of  
489 errors was also confirmed using Illumina data (~600X coverage) generated from the same DNA  
490 sample.

491 *Wolbachia* genomes range in size from ~0.9-1.8 Mb. Currently, 42 genomes have been  
492 deposited in the GenBank database, however, only 12 genomes show complete status. The  
493 complete circular *wAlbB* chromosome is 1,484,007 bp in size making it one of the largest  
494 sequenced *Wolbachia* genomes to date. The complete assembly is 321 kb larger than the draft  
495 sequence (Mavingui et al. 2012) and contains all the contigs from the published genome. Many

496 of the gaps in the published draft were observed to be flanked by IS elements, suggesting that the  
497 repetitive nature of IS elements hinders assembly. Additionally, some contigs from the published  
498 draft mapped to multiple locations in the finished genome, indicating that they originate from  
499 repeated regions in the genome. Such repeated regions can be difficult to assemble using only  
500 short reads from Illumina or 454 platforms, but can be successfully assembled using PacBio long  
501 reads.

502 The genome of *wAlbB* contains 218 IS elements, belonging to 10 families, including one  
503 new family, scattered throughout the genome. The genomes of arthropod infecting *Wolbachia*  
504 have a large number of repetitive and mobile elements, particularly IS elements (Cerveau et al.  
505 2011). A total of 11 distinct IS families was reported across *wBm*, *wPel*, *wRi*, and *wMel*  
506 genomes (Cerveau et al. 2011). The distribution and copy number of IS elements from different  
507 families varies between genomes (Cerveau et al. 2011). The *wAlbB* genome lacks members  
508 from IS6 and IS200/605 families, while IS982 (n=96) and IS481 (n=75) are present in higher  
509 abundance in comparison to other *Wolbachia* genomes (Cerveau et al. 2011). IS elements can  
510 cause disruption of genes, giving rise to pseudogenes. In *wAlbB*, many such examples were  
511 observed, e.g. pseudogenization of *rsmD* and *dgkA* genes.

512 Prophages represent another class of highly mobile elements that can have a significant  
513 impact on *Wolbachia* biology (Gavotte et al. 2007; Bordenstein & Bordenstein 2016; LePage et  
514 al. 2017; Beckmann et al. 2017). In a previous study of wild-caught, *Ae. albopictus* mosquitoes  
515 carrying either only *wAlbA* or both *wAlbA* and *wAlbB*, phage particles could be detected and  
516 quantified using qPCR (Chauvatcharin et al. 2006). In the current *wAlbB* genome, although 40  
517 of the 63 genes from the WOVitA1 prophage (Bordenstein & Bordenstein 2016) could be found,  
518 many genes encoding essential components for a phage particle assembly were absent, while a

519 few others were pseudogenized due to insertion of IS elements. In addition, the prophage related  
520 genes were found to be scattered over the *wAlbB* genome, unlike in an intact prophage.  
521 Therefore the ancestral temperate prophage has undergone degradation in the *wAlbB* genome, a  
522 phenomenon also observed in other *Wolbachia* such as *wRec* from *Drosophila recens* (Metcalf et  
523 al. 2014). It is therefore possible that the phage particles previously reported in *Ae. albopictus*  
524 mosquitoes (Chauvatcharin et al. 2006) were derived only from *wAlbA*, or the *wAlbB* phage was  
525 degraded during its *in vitro* culture in Aa23 cells. Interestingly, orthologs of the 2 WO prophage  
526 proteins *cifA* and *cifB* involved in cytoplasmic incompatibility (LePage et al. 2017; Beckmann et  
527 al. 2017) are encoded in *wAlbB* by two pairs of genes, but are not in close proximity to the  
528 prophage-derived genes or gene clusters. These gene-pairs might be remnants from an earlier  
529 integrated prophage which has since undergone degradation. Similarly, in another *Wolbachia*,  
530 *wRec*, approximately 75% of its prophage gene content has been lost (Metcalf et al. 2014), but  
531 still retains an intact *cifA*, *cifB* gene pair (Lindsey et al. 2018).

532         Orthology analysis of all annotated proteins from *wAlbB* and 12 other complete  
533 *Wolbachia* genomes identified the core *Wolbachia* proteome comprising 536 orthogroups. The  
534 majority of these (n=519) contain single-copy, 1:1 orthologs which are ideally suited for  
535 phylogenomic analysis. Further analysis of this core proteome could shed light on the unique  
536 intracellular lifestyle of *Wolbachia* and provide insight into essential *Wolbachia* genes that may  
537 be targeted in an anti-symbiotic approach to new drug discovery in filarial parasites. On the other  
538 hand, studies on orthogroups unique to a particular genome (e.g. 13 proteins present only in  
539 *wAlbB*) may lead to the discovery of proteins which are involved in the adaptation of *Wolbachia*  
540 to a particular host/cell niche.



541           The T4SS of *wAlbB* is encoded by two operons and a few genes scattered throughout the  
542 genome. Their organization and sequence are conserved across various *Wolbachia*, likely due to  
543 their important roles in its biology, such as secretion of effectors that influence host:bacteria  
544 interactions. Several candidate effectors of the T4SS in *wMel* were identified recently (Rice et  
545 al. 2017), including one which interacts with the host cytoskeleton (Sheehan et al. 2016).  
546 Ankyrins are established T4SS effectors of intracellular bacteria. The genome of *wAlbB*  
547 encodes 34 ANK proteins. *ANK* genes in *wPip* are linked to polymorphisms in cytoplasmic  
548 incompatibility phenotypes in *Culex pipiens* mosquitoes (Sinkins et al. 2005). In the closely  
549 related *Anaplasma* and *Ehrlichia*, an ankyrin repeat-containing (ANK) protein has been shown to  
550 regulate transcription, suppress host innate immunity, inhibit host cell apoptosis and reduce  
551 reactive oxygen species (Rikihisa & Lin 2010; Liu et al. 2012). However, most *ANK* genes  
552 contain many copies of short open reading frames of unknown function (Wu et al. 2004). The  
553 T4SS could also be involved in lateral gene transfer events between *Wolbachia* and its host  
554 (Dunning Hotopp et al. 2007). For example, *VirB6*, an essential trans-membrane channel  
555 component of the T4SS in many bacteria, has been shown to direct DNA export through the  
556 T4SS in *Agrobacterium tumefaciens* (Jakubowski et al. 2004). Interestingly, all *Wolbachia*  
557 genomes, including *wAlbB*, encode 4 *VirB6* paralogs.

558           Comparing the KEGG pathway maps and KO assignments in *wAlbB* with those in  
559 closely related *wPip* and *wRi* identified 5 proteins that were absent in *wAlbB*, namely *DgkA*,  
560 *MPG*, *CydA*, *CydB* and *FtsI*. In the *wAlbB* genome, *dgkA* is pseudogenized due to insertion of  
561 an IS982 family transposase, while the gene is intact in *wMel*, *wRi*, *wHa*, *wNo* and *wPip*, but is  
562 absent in *wBm*, *wOo* and *wCle*. *DgkA* phosphorylates diacylglycerol to generate phosphatidic  
563 acid in glycerolipid and glycerophospholipid metabolism pathways and plays an important role

564 in microbial stress-responses (Yamashita et al. 1993). MPG is involved in the DNA base  
565 excision repair pathway by recognizing a variety of base lesions, mainly caused by alkylating  
566 agents, resulting in release of the damaged base in free form from alkylated DNA and initiation  
567 of repair (Costa de Oliveira et al. 1987). *MPG* is present in all the *Wolbachia* examined here,  
568 except *wAlbB*. The genes *cydA* and *cydB* are present in *wMel*, *wRi*, *wHa*, and *wNo*, yet absent in  
569 *wBm*, *wOo*, *wCle* and *wAlbB*. The proteins CydA and CydB are members of a family of integral  
570 membrane proteins involved in catalyzing terminal electron transfer in eubacterial and archaeal  
571 respiration. Their high oxygen affinity enable them to scavenge and reduce oxygen to water,  
572 preventing damage to oxygen-sensitive enzymes, and permitting growth in microaerobic and  
573 anaerobic environments and survival under a number of stress conditions (Borisov et al. 2011).  
574 FtsI is a class B3 penicillin-binding protein (PBP B3) that functions as a transpeptidase in  
575 peptidoglycan metabolism, essential for bacterial cell wall synthesis and cell division (Cayô et al.  
576 2011). Although *wAlbB* does not have FtsI, it does contain a class PBP B2 transpeptidase,  
577 MrdA, while other *Wolbachia*, *wMel*, *wRi*, *wHa*, and *wCle*, have both FtsI and MrdA, indicating  
578 potential redundancy.

579 The availability of a complete circular genome from *wAlbB* will provide further insight  
580 into phylogenetic relationships between the different *Wolbachia* supergroups, and enable further  
581 biochemical, molecular and genetic analyses on *wAlbB* and related *Wolbachia*. The annotation  
582 and analysis of mobile elements highlight their considerable effect on genome evolution and  
583 gene content in intracellular symbionts, suggesting that such elements could be re-purposed as  
584 tools for genetic manipulation of *Wolbachia*. The genome also provides an important baseline  
585 for further studies of *Wolbachia* interactions with its host that may advance practical applications  
586 such as the use of *Wolbachia* for pest and disease control.

587

588

589 **Acknowledgments**

590 The authors thank the following for helpful discussions and comments on the manuscript: Brian  
591 Anton, Rich Roberts, Peter Weigele, Rick Morgan, Tom Evans, Bill Jack, Jeremy Foster, Barton  
592 Slatko, Emilie Lefoulon, Youseuf Suliman and Catherine Poole; and the DNA sequencing core  
593 at New England Biolabs for Illumina sequencing. The authors are also grateful for the continued  
594 encouragement from Don Comb. This work was supported by New England Biolabs.

595

## 596 Literature Cited

- 597 Aliota MT, Walker EC, et al. 2016. The wMel strain of *Wolbachia* reduces transmission of  
598 chikungunya virus in *Aedes aegypti*. PLoS Negl. Trop. Dis. 10:e0004677. doi:  
599 10.1371/journal.pntd.0004677.
- 600 Aliota MT, Peinado SA, Velez ID, Osorio JE. 2016. The wMel strain of *Wolbachia* reduces  
601 transmission of Zika virus by *Aedes aegypti*. Sci. Rep. 6:srep28792. doi: 10.1038/srep28792.
- 602 Andrews ES, Crain PR, Fu Y, Howe DK, Dobson SL. 2012. Reactive Oxygen Species  
603 Production and *Brugia pahangi* Survivorship in *Aedes polynesiensis* with Artificial *Wolbachia*  
604 Infection Types. PLOS Pathog. 8:e1003075. doi: 10.1371/journal.ppat.1003075.
- 605 Angiuoli SV et al. 2008. Toward an Online Repository of Standard Operating Procedures (SOPs)  
606 for (Meta)genomic Annotation. OMICS J. Integr. Biol. 12:137–141. doi:  
607 10.1089/omi.2008.0017.
- 608 Arndt D et al. 2016. PHASTER: a better, faster version of the PHAST phage search tool. Nucleic  
609 Acids Res. 44:W16–W21. doi: 10.1093/nar/gkw387.
- 610 Bazzocchi C et al. 2008. Combined ivermectin and doxycycline treatment has microfilaricidal  
611 and adulticidal activity against *Dirofilaria immitis* in experimentally infected dogs. Int. J.  
612 Parasitol. 38:1401–1410. doi: 10.1016/j.ijpara.2008.03.002.
- 613 Beckmann JF, Ronau JA, Hochstrasser M. 2017. A *Wolbachia* deubiquitylating enzyme induces  
614 cytoplasmic incompatibility. Nat. Microbiol. 2:17007. doi: 10.1038/nmicrobiol.2017.7.
- 615 Bordenstein Sarah R., Bordenstein Seth R. 2016. Eukaryotic association module in phage WO  
616 genomes from *Wolbachia*. Nat. Commun. 7:13155. doi: 10.1038/ncomms13155.
- 617 Borisov VB, Gennis RB, Hemp J, Verkhovsky MI. 2011. The cytochrome bd respiratory oxygen  
618 reductases. Biochim. Biophys. Acta BBA - Bioenerg. 1807:1398–1413. doi:  
619 10.1016/j.bbabi.2011.06.016.
- 620 Carrington LB et al. 2018. Field- and clinically derived estimates of *Wolbachia*-mediated  
621 blocking of dengue virus transmission potential in *Aedes aegypti* mosquitoes. Proc. Natl. Acad.  
622 Sci. 115:361–366. doi: 10.1073/pnas.1715788115.
- 623 Cayô R et al. 2011. Analysis of Genes Encoding Penicillin-Binding Proteins in Clinical Isolates  
624 of *Acinetobacter baumannii*. Antimicrob. Agents Chemother. 55:5907–5913. doi:  
625 10.1128/AAC.00459-11.
- 626 Cerveau N, Leclercq S, Leroy E, Bouchon D, Cordaux R. 2011. Short- and Long-term  
627 Evolutionary Dynamics of Bacterial Insertion Sequences: Insights from *Wolbachia*  
628 Endosymbionts. Genome Biol. Evol. 3:1175–1186. doi: 10.1093/gbe/evr096.

- 629 Chauvatcharin N, Ahantarig A, Baimai V, Kittayapong P. 2006. Bacteriophage WO-B and  
630 *Wolbachia* in natural mosquito hosts: infection incidence, transmission mode and relative  
631 density. *Mol. Ecol.* 15:2451–2461. doi: 10.1111/j.1365-294X.2006.02947.x.
- 632 Chin C-S et al. 2013. Nonhybrid, finished microbial genome assemblies from long-read SMRT  
633 sequencing data. *Nat. Methods.* 10:563. doi: 10.1038/nmeth.2474.
- 634 Chouin-Carneiro T et al. 2016. Differential Susceptibilities of *Aedes aegypti* and *Aedes*  
635 *albopictus* from the Americas to Zika Virus. *PLoS Negl. Trop. Dis.* 10:e0004543. doi:  
636 10.1371/journal.pntd.0004543.
- 637 Conway JR, Lex A, Gehlenborg N, Hancock J. 2017. UpSetR: an R package for the visualization  
638 of intersecting sets and their properties. *Bioinformatics.* 33:2938–2940. doi:  
639 10.1093/bioinformatics/btx364.
- 640 Cordaux R, Bouchon D, Grève P. 2011. The impact of endosymbionts on the evolution of host  
641 sex-determination mechanisms. *Trends Genet.* 27:332–341. doi: 10.1016/j.tig.2011.05.002.
- 642 Costa de Oliveira R, Laval J, Boiteux S. 1987. Induction of SOS and adaptive responses by  
643 alkylating agents in *Escherichia coli mutants* deficient in 3-methyladenine-DNA glycosylase  
644 activities. *Mutat. Res. Repair Rep.* 183:11–20. doi: 10.1016/0167-8817(87)90040-X.
- 645 Dobson SL, Marsland EJ, Rattanadachakul W. 2001. *Wolbachia*-Induced Cytoplasmic  
646 Incompatibility in Single- and Superinfected *Aedes albopictus* (Diptera: Culicidae). *J. Med.*  
647 *Entomol.* 38:382–387. doi: 10.1603/0022-2585-38.3.382.
- 648 Dobson SL, Marsland EJ, Veneti Z, Bourtzis K, O’Neill SL. 2002. Characterization of  
649 *Wolbachia* Host Cell Range via the In Vitro Establishment of Infections. *Appl Env. Microbiol.*  
650 68:656–660. doi: 10.1128/AEM.68.2.656-660.2002.
- 651 Dodson BL et al. 2014. *Wolbachia* Enhances West Nile Virus (WNV) Infection in the Mosquito  
652 *Culex tarsalis*. *PLoS Negl. Trop. Dis.* 8:e2965. doi: 10.1371/journal.pntd.0002965.
- 653 Dunning Hotopp JC et al. 2007. Widespread lateral gene transfer from intracellular bacteria to  
654 multicellular eukaryotes. *Science.* 317:1753–1756. doi: 10.1126/science.1142490.
- 655 Eid J et al. 2008. Real-Time DNA Sequencing from Single Polymerase Molecules. *Science.* doi:  
656 10.1126/science.1162986.
- 657 Emms DM, Kelly S. 2015. OrthoFinder: solving fundamental biases in whole genome  
658 comparisons dramatically improves orthogroup inference accuracy. *Genome Biol.* 16:157. doi:  
659 10.1186/s13059-015-0721-2.
- 660 Félix C et al. 2008. Characterization and transcriptional analysis of two gene clusters for  
661 type IV secretion machinery in *Wolbachia* of *Armadillidium vulgare*. *Res. Microbiol.* 159:481–  
662 485. doi: 10.1016/j.resmic.2008.05.007.

- 663 Fenn K et al. 2006. Phylogenetic Relationships of the *Wolbachia* of Nematodes and Arthropods.  
664 PLOS Pathog. 2:e94. doi: 10.1371/journal.ppat.0020094.
- 665 Fenollar F, Scola BL, et al. 2003. Culture and Phenotypic Characterization of a *Wolbachia*  
666 *pipientis* Isolate. J. Clin. Microbiol. 41:5434–5441. doi: 10.1128/JCM.41.12.5434-5441.2003.
- 667 Fenollar F, Maurin M, Raoult D. 2003. *Wolbachia pipientis* Growth Kinetics and Susceptibilities  
668 to 13 Antibiotics Determined by Immunofluorescence Staining and Real-Time PCR. Antimicrob.  
669 Agents Chemother. 47:1665–1671. doi: 10.1128/AAC.47.5.1665-1671.2003.
- 670 Finn RD et al. 2016. The Pfam protein families database: towards a more sustainable future.  
671 Nucleic Acids Res. 44:D279–D285. doi: 10.1093/nar/gkv1344.
- 672 Flusberg BA et al. 2010. Direct detection of DNA methylation during single-molecule, real-time  
673 sequencing. Nat. Methods. 7:461–465. doi: 10.1038/nmeth.1459.
- 674 Gao F, Luo H, Zhang C-T. 2013. DoriC 5.0: an updated database of oriC regions in both  
675 bacterial and archaeal genomes. Nucleic Acids Res. 41:D90–D93. doi: 10.1093/nar/gks990.
- 676 Gavotte L et al. 2007. A Survey of the Bacteriophage WO in the Endosymbiotic Bacteria  
677 *Wolbachia*. Mol. Biol. Evol. 24:427–435. doi: 10.1093/molbev/msl171.
- 678 Gerenday A, Fallon AM. 1996. Cell cycle parameters in *Aedes albopictus* mosquito cells. Vitro  
679 Cell. Dev. Biol. - Anim. 32:307–312. doi: 10.1007/BF02723064.
- 680 Grard G et al. 2014. Zika Virus in Gabon (Central Africa) – 2007: A New Threat from *Aedes*  
681 *albopictus*? PLoS Negl. Trop. Dis. 8:e2681. doi: 10.1371/journal.pntd.0002681.
- 682 Gratz NG. 2004. Critical review of the vector status of *Aedes albopictus*. Med. Vet. Entomol.  
683 18:215–227. doi: 10.1111/j.0269-283X.2004.00513.x.
- 684 Grohmann E, Christie PJ, Waksman G, Backert S. 2018. Type IV secretion in Gram-negative  
685 and Gram-positive bacteria. Mol. Microbiol. 107:455–471. doi: 10.1111/mmi.13896.
- 686 Gu Z, Gu L, Eils R, Schlesner M, Brors B. 2014. circlize Implements and enhances circular  
687 visualization in R. Bioinforma. Oxf. Engl. 30:2811–2812. doi: 10.1093/bioinformatics/btu393.
- 688 Hertig M. 1936. The Rickettsia, *Wolbachia pipientis* (gen. et sp.n.) and Associated Inclusions of  
689 the Mosquito, *Culex pipiens*. Parasitology. 28:453–486. doi: 10.1017/S0031182000022666.
- 690 Hilgenboecker K, Hammerstein P, Schlattmann P, Telschow A, Werren JH. 2008. How many  
691 species are infected with *Wolbachia*? – a statistical analysis of current data. FEMS Microbiol.  
692 Lett. 281:215–220. doi: 10.1111/j.1574-6968.2008.01110.x.
- 693 Huerta-Cepas J et al. 2016. eggNOG 4.5: a hierarchical orthology framework with improved  
694 functional annotations for eukaryotic, prokaryotic and viral sequences. Nucleic Acids Res.  
695 44:D286–D293. doi: 10.1093/nar/gkv1248.

- 696 Huerta-Cepas J et al. 2017. Fast Genome-Wide Functional Annotation through Orthology  
697 Assignment by eggNOG-Mapper. *Mol. Biol. Evol.* 34:2115–2122. doi: 10.1093/molbev/msx148.
- 698 Hughes GL, Koga R, Xue P, Fukatsu T, Rasgon JL. 2011. *Wolbachia* Infections Are Virulent  
699 and Inhibit the Human Malaria Parasite *Plasmodium falciparum* in *Anopheles gambiae*. *PLOS*  
700 *Pathog.* 7:e1002043. doi: 10.1371/journal.ppat.1002043.
- 701 Hughes GL, Vega-Rodriguez J, Xue P, Rasgon JL. 2012. *Wolbachia* Strain wAlbB Enhances  
702 Infection by the Rodent Malaria Parasite *Plasmodium berghei* in *Anopheles gambiae*  
703 Mosquitoes. *Appl Env. Microbiol.* 78:1491–1495. doi: 10.1128/AEM.06751-11.
- 704 Ioannidis P et al. 2007. New criteria for selecting the origin of DNA replication in *Wolbachia*  
705 and closely related bacteria. *BMC Genomics.* 8:182. doi: 10.1186/1471-2164-8-182.
- 706 Jakubowski SJ, Krishnamoorthy V, Cascales E, Christie PJ. 2004. *Agrobacterium tumefaciens*  
707 VirB6 Domains Direct the Ordered Export of a DNA Substrate Through a Type IV Secretion  
708 System. *J. Mol. Biol.* 341:961–977. doi: 10.1016/j.jmb.2004.06.052.
- 709 Johnston KL et al. 2014. Repurposing of approved drugs from the human pharmacopoeia to  
710 target *Wolbachia* endosymbionts of onchocerciasis and lymphatic filariasis. *Int. J. Parasitol.*  
711 *Drugs Drug Resist.* 4:278–286. doi: 10.1016/j.ijpddr.2014.09.001.
- 712 Kambris Z et al. 2010. *Wolbachia* Stimulates Immune Gene Expression and Inhibits *Plasmodium*  
713 Development in *Anopheles gambiae*. *PLOS Pathog.* 6:e1001143. doi:  
714 10.1371/journal.ppat.1001143.
- 715 Kambris Z, Cook PE, Phuc HK, Sinkins SP. 2009. Immune Activation by Life-Shortening  
716 *Wolbachia* and Reduced Filarial Competence in Mosquitoes. *Science.* 326:134–136. doi:  
717 10.1126/science.1177531.
- 718 Kittayapong P, Baisley KJ, Baimai V, O’Neill SL. 2000. Distribution and Diversity of  
719 *Wolbachia* Infections in Southeast Asian Mosquitoes (Diptera: Culicidae). *J. Med. Entomol.*  
720 37:340–345. doi: 10.1093/jmedent/37.3.340.
- 721 Kotsakiozi P et al. 2017. Population genomics of the Asian tiger mosquito, *Aedes albopictus*:  
722 insights into the recent worldwide invasion. *Ecol. Evol.* 7:10143–10157. doi: 10.1002/ece3.3514.
- 723 Krzywinski M et al. 2009. Circos: An information aesthetic for comparative genomics. *Genome*  
724 *Res.* 19:1639–1645. doi: 10.1101/gr.092759.109.
- 725 Kurtz S et al. 2004. Versatile and open software for comparing large genomes. *Genome Biol.*  
726 5:R12. doi: 10.1186/gb-2004-5-2-r12.
- 727 Langworthy NG et al. 2000. Macroparasiticide activity of tetracycline against the filarial nematode  
728 *Onchocerca ochengi*: elimination of *Wolbachia* precedes worm death and suggests a dependent  
729 relationship. *Proc. R. Soc. Lond. B Biol. Sci.* 267:1063–1069. doi: 10.1098/rspb.2000.1110.

- 730 Lefoulon E et al. 2016. Breakdown of coevolution between symbiotic bacteria *Wolbachia* and  
731 their filarial hosts. PeerJ. 4:e1840. doi: 10.7717/peerj.1840.
- 732 LePage DP et al. 2017. Prophage WO genes recapitulate and enhance *Wolbachia*-induced  
733 cytoplasmic incompatibility. Nature. 543:243. doi: 10.1038/nature21391.
- 734 Lex A, Gehlenborg N, Strobel H, Vuillemot R, Pfister H. 2014. UpSet: Visualization of  
735 Intersecting Sets. IEEE Trans. Vis. Comput. Graph. 20:1983–1992. doi:  
736 10.1109/TVCG.2014.2346248.
- 737 Li H, Durbin R. 2009. Fast and accurate short read alignment with Burrows-Wheeler transform.  
738 Bioinformatics. 25:1754–1760. doi: 10.1093/bioinformatics/btp324.
- 739 Li Z, Carlow CKS. 2012. Characterization of Transcription Factors That Regulate the Type IV  
740 Secretion System and Riboflavin Biosynthesis in *Wolbachia* of *Brugia malayi*. PLOS ONE.  
741 7:e51597. doi: 10.1371/journal.pone.0051597.
- 742 Lin M, Dulk-Ras AD, Hooykaas PJJ, Rikihisa Y. 2007. *Anaplasma phagocytophilum* AnkA  
743 secreted by type IV secretion system is tyrosine phosphorylated by Abl-1 to facilitate infection.  
744 Cell. Microbiol. 9:2644–2657. doi: 10.1111/j.1462-5822.2007.00985.x.
- 745 Lindsey ARI et al. 2018. Evolutionary Genetics of Cytoplasmic Incompatibility Genes *cifA* and  
746 *cifB* in Prophage WO of *Wolbachia*. Genome Biol. Evol. 10:434–451. doi: 10.1093/gbe/evy012.
- 747 Liu H, Bao W, Lin M, Niu H, Rikihisa Y. 2012. *Ehrlichia* type IV secretion effector ECH0825 is  
748 translocated to mitochondria and curbs ROS and apoptosis by upregulating host MnSOD. Cell.  
749 Microbiol. 14:1037–1050. doi: 10.1111/j.1462-5822.2012.01775.x.
- 750 Lo N et al. 2007. Taxonomic status of the intracellular bacterium *Wolbachia pipientis*. Int. J.  
751 Syst. Evol. Microbiol. 57:654–657. doi: 10.1099/ijs.0.64515-0.
- 752 Masui S et al. 2001. Bacteriophage WO and Virus-like Particles in *Wolbachia*, an Endosymbiont  
753 of Arthropods. Biochem. Biophys. Res. Commun. 283:1099–1104. doi: 10.1006/bbrc.2001.4906.
- 754 Masui S, Kamoda S, Sasaki T, Ishikawa H. 2000. Distribution and Evolution of Bacteriophage  
755 WO in *Wolbachia*, the Endosymbiont Causing Sexual Alterations in Arthropods. J. Mol. Evol.  
756 51:491–497. doi: 10.1007/s002390010112.
- 757 Mavingui P et al. 2012. Whole-Genome Sequence of *Wolbachia* Strain *wAlbB*, an  
758 Endosymbiont of Tiger Mosquito Vector *Aedes albopictus*. J. Bacteriol. 194:1840–1840. doi:  
759 10.1128/JB.00036-12.
- 760 Metcalf JA, Jo M, Bordenstein Sarah R., Jaenike J, Bordenstein Seth R. 2014. Recent genome  
761 reduction of *Wolbachia* in *Drosophila recens* targets phage WO and narrows candidates for  
762 reproductive parasitism. PeerJ. 2:e529. doi: 10.7717/peerj.529.



- 763 Moriya Y, Itoh M, Okuda S, Yoshizawa AC, Kanehisa M. 2007. KAAS: an automatic genome  
764 annotation and pathway reconstruction server. *Nucleic Acids Res.* 35:W182–W185. doi:  
765 10.1093/nar/gkm321.
- 766 Mousson L et al. 2012. The Native *Wolbachia* Symbionts Limit Transmission of Dengue Virus  
767 in *Aedes albopictus*. *PLoS Negl. Trop. Dis.* 6:e1989. doi: 10.1371/journal.pntd.0001989.
- 768 O’Neill SL et al. 1997. In vitro cultivation of *Wolbachia pipientis* in an *Aedes albopictus* cell  
769 line. *Insect Mol. Biol.* 6:33–39. doi: 10.1046/j.1365-2583.1997.00157.x.
- 770 Pan X et al. 2018. The bacterium *Wolbachia* exploits host innate immunity to establish a  
771 symbiotic relationship with the dengue vector mosquito *Aedes aegypti*. *ISME J.* 12:277–288. doi:  
772 10.1038/ismej.2017.174.
- 773 Rancès E, Voronin D, Tran-Van V, Mavingui P. 2008. Genetic and Functional Characterization  
774 of the Type IV Secretion System in *Wolbachia*. *J. Bacteriol.* 190:5020–5030. doi:  
775 10.1128/JB.00377-08.
- 776 Raquin V et al. 2015. Native *Wolbachia* from *Aedes albopictus* Blocks Chikungunya Virus  
777 Infection *In Cellulo*. *PLOS ONE.* 10:e0125066. doi: 10.1371/journal.pone.0125066.
- 778 Rasgon JL, Ren X, Petridis M. 2006. Can *Anopheles gambiae* Be Infected with *Wolbachia*  
779 *pipientis*? Insights from an In Vitro System. *Appl Env. Microbiol.* 72:7718–7722. doi:  
780 10.1128/AEM.01578-06.
- 781 Rice DW, Sheehan KB, Newton ILG. 2017. Large-Scale Identification of *Wolbachia pipientis*  
782 Effectors. *Genome Biol. Evol.* 9:1925–1937. doi: 10.1093/gbe/evx139.
- 783 Rikihisa Y, Lin M. 2010. *Anaplasma phagocytophilum* and *Ehrlichia chaffeensis* type IV  
784 secretion and Ank proteins. *Curr. Opin. Microbiol.* 13:59–66. doi: 10.1016/j.mib.2009.12.008.
- 785 Saucereau Y et al. 2017. Comprehensive proteome profiling in *Aedes albopictus* to decipher  
786 *Wolbachia*-arbovirus interference phenomenon. *BMC Genomics.* 18:635. doi: 10.1186/s12864-  
787 017-3985-y.
- 788 Sheehan KB, Martin M, Lesser CF, Isberg RR, Newton ILG. 2016. Identification and  
789 Characterization of a Candidate *Wolbachia pipientis* Type IV Effector That Interacts with the  
790 Actin Cytoskeleton. *mBio.* 7:e00622-16. doi: 10.1128/mBio.00622-16.
- 791 Siguier P, Gourbeyre E, Varani A, Ton-Hoang B, Chandler M. 2015. Everyman’s Guide to  
792 Bacterial Insertion Sequences. 555–590. doi: 10.1128/microbiolspec.MDNA3-0030-2014.
- 793 Siguier P, Perochon J, Lestrade L, Mahillon J, Chandler M. 2006. ISfinder: the reference centre  
794 for bacterial insertion sequences. *Nucleic Acids Res.* 34:D32–D36. doi: 10.1093/nar/gkj014.
- 795 Simão FA, Waterhouse RM, Ioannidis P, Kriventseva EV, Zdobnov EM. 2015. BUSCO:  
796 assessing genome assembly and annotation completeness with single-copy orthologs.  
797 *Bioinformatics.* 31:3210–3212. doi: 10.1093/bioinformatics/btv351.

- 798 Sinkins SP. 2004. *Wolbachia* and cytoplasmic incompatibility in mosquitoes. *Insect Biochem.*  
799 *Mol. Biol.* 34:723–729. doi: 10.1016/j.ibmb.2004.03.025.
- 800 Sinkins SP et al. 2005. *Wolbachia* variability and host effects on crossing type in *Culex*  
801 *mosquitoes*. *Nature*. 436:257–260. doi: 10.1038/nature03629.
- 802 Sinkins SP, Braig HR, Oneill SL. 1995. *Wolbachia pipientis*: Bacterial Density and  
803 Unidirectional Cytoplasmic Incompatibility between Infected Populations of *Aedes albopictus*.  
804 *Exp. Parasitol.* 81:284–291. doi: 10.1006/expr.1995.1119.
- 805 Taylor MJ, Bandi C, Hoerauf A. 2005. *Wolbachia* Bacterial Endosymbionts of Filarial  
806 Nematodes. In: *Advances in Parasitology*. Baker, JR, Muller, R, & Rollinson, D, editors. Vol. 60  
807 Academic Press pp. 245–284. doi: 10.1016/S0065-308X(05)60004-8.
- 808 Varani AM, Siguier P, Gourbeyre E, Charneau V, Chandler M. 2011. ISSaga is an ensemble of  
809 web-based methods for high throughput identification and semi-automatic annotation of insertion  
810 sequences in prokaryotic genomes. *Genome Biol.* 12:R30. doi: 10.1186/gb-2011-12-3-r30.
- 811 Voronin D, Cook DAN, Steven A, Taylor MJ. 2012. Autophagy regulates *Wolbachia*  
812 populations across diverse symbiotic associations. *Proc. Natl. Acad. Sci.* 109:E1638–E1646. doi:  
813 10.1073/pnas.1203519109.
- 814 Walker BJ et al. 2014. Pilon: An Integrated Tool for Comprehensive Microbial Variant  
815 Detection and Genome Assembly Improvement. *PLOS ONE*. 9:e112963. doi:  
816 10.1371/journal.pone.0112963.
- 817 Walker T et al. 2011. The wMel *Wolbachia* strain blocks dengue and invades caged *Aedes*  
818 *aegypti* populations. *Nature*. 476:450–453. doi: 10.1038/nature10355.
- 819 Watson M. 2018. Mind the gaps - ignoring errors in long read assemblies critically affects  
820 protein prediction. bioRxiv. 285049. doi: 10.1101/285049.
- 821 Werren JH, Baldo L, Clark ME. 2008. *Wolbachia*: master manipulators of invertebrate biology.  
822 *Nat. Rev. Microbiol.* 6:741–751. doi: 10.1038/nrmicro1969.
- 823 Wu M et al. 2004. Phylogenomics of the Reproductive Parasite *Wolbachia pipientis* wMel: A  
824 Streamlined Genome Overrun by Mobile Genetic Elements. *PLOS Biol.* 2:e69. doi:  
825 10.1371/journal.pbio.0020069.
- 826 Xi Z, Khoo CCH, Dobson SL. 2005. *Wolbachia* establishment and invasion in an *Aedes aegypti*  
827 laboratory population. *Science*. 310:326–328. doi: 10.1126/science.1117607.
- 828 Yamashita Y, Takehara T, Kuramitsu HK. 1993. Molecular characterization of a *Streptococcus*  
829 *mutans* mutant altered in environmental stress responses. *J. Bacteriol.* 175:6220–6228. doi:  
830 10.1128/jb.175.19.6220-6228.1993.

831 Zouache K et al. 2009. Persistent *Wolbachia* and Cultivable Bacteria Infection in the  
832 Reproductive and Somatic Tissues of the Mosquito Vector *Aedes albopictus*. PLOS ONE.  
833 4:e6388. doi: 10.1371/journal.pone.0006388.

834

## 835 **Figure Legends**

836 **Fig. 1. Detection of *Wolbachia* in Aa23 cells and in culture supernatants.** Immunostaining of  
837 *Wolbachia* using an anti-VirB8 antibody (green) and Hoechst staining (blue) of host nuclei (A).  
838 Hoechst staining of *Wolbachia* in cells (B) and in spent media (C). Arrows indicate *Wolbachia*.

839 **Fig. 2. Circularization and polishing of the *wAlbB* genome assembly and determination of**  
840 ***oriC*.** *De novo* assembly of PacBio data produced a single contig representing the *wAlbB*  
841 genome, with terminal regions marked A1 and A2 in (A), showing high sequence identity over a  
842 27 kb region, suggesting overlapping ends of a circular chromosome. They were therefore  
843 collapsed into a single consensus region “A” to represent the circular the chromosome, with the  
844 junction of circularization between regions A and B indicated by a blue arrow (B). This draft  
845 circular genome was polished using the PacBio ReSequencing.1 pipeline, and the junction of  
846 circularization was validated by Sanger sequencing of a 1.5 kb amplicon (C) produced by  
847 primers F1 and R1. The origin of the circular chromosome was reset to the beginning of the  
848 *oriC* locus. The permuted chromosome sequence was again polished using ReSequencing.1  
849 pipeline in SMRT analysis software. The *oriC* sequence and the new junction of circularization  
850 at *oriC* was verified by primers F2 and R2 (A and B) that successfully produced an amplicon of  
851 correct size 1.5kb (C) and correct sequence as confirmed by Sanger sequencing. The *oriC* locus  
852 in *wAlbB* has all the hallmarks observed in other *Wolbachia oriC* sequences, such as flanking  
853 genes *tlyC* and *hemE*, three DnaA binding sites, four IHF binding sites and one CtrA binding site  
854 (D). All PCR were performed on four independent DNA samples.

855

856 Fig. 3. **Circos plot representation of features on the circular *wAlbB* genome.** The *wAlbB*  
857 genome is represented as the outer blue circle, with the coordinates marked on the outermost  
858 circle. (A) The completed *wAlbB* genome contains all the contigs from the published draft  
859 genome (depicted in light blue on the 1<sup>st</sup> inner circle) revealing the gaps (white regions, 1<sup>st</sup> inner  
860 circle). The IS elements (purple, innermost circle) are distributed all over the genome, and tend  
861 to be located near the gaps, close to the termini of the contigs from the published draft. (B)  
862 Positions of prophage genes and pseudogenes with orthologs in WOVitA1 and *wMel* genomes  
863 are indicated on the first inner circle. The positions of the *cifA-cifB* gene pairs are also indicated  
864 on this track. Locations of genes encoding ankyrin proteins (green) and T4SS components  
865 (yellow) are indicated on the second inner circle.

866

867 Fig. 4. **Orthology analysis of proteins from all complete *Wolbachia* genomes identifies core**  
868 ***Wolbachia* proteome.** The set of all 13,002 proteins from *wAlbB* and 12 other completed  
869 *Wolbachia* genomes were grouped into 1,171 orthogroups using the OrthoFinder software. Of  
870 these, 536 orthogroups were present across all the genomes analyzed, representing the core  
871 *Wolbachia* proteome, represented by the first bar in the Upset plot. Other orthogroups showed  
872 various patterns of distribution. Filled dots (black) denote presence and empty dots (grey)  
873 indicate absence of orthogroups in each *Wolbachia*. Genomes of *Wolbachia* from *Drosophila*  
874 *melanogaster* (*wMel*), *Drosophila simulans* (*wRi*, *wHa*, *wNo*, *wAu*), *Culex quinquefasciatus*  
875 (*wPip*), *Brugia malayi* (*wBm*), *Onchocerca ochengi* (*wOo*), *Onchocerca volvulus* (*wOv*),  
876 *Folsomia candida* (*wFol*), *Trichogramma pretiosum* (*wTpre*) and *Cimex lectularius* (*wCle*) were  
877 included in the analysis.

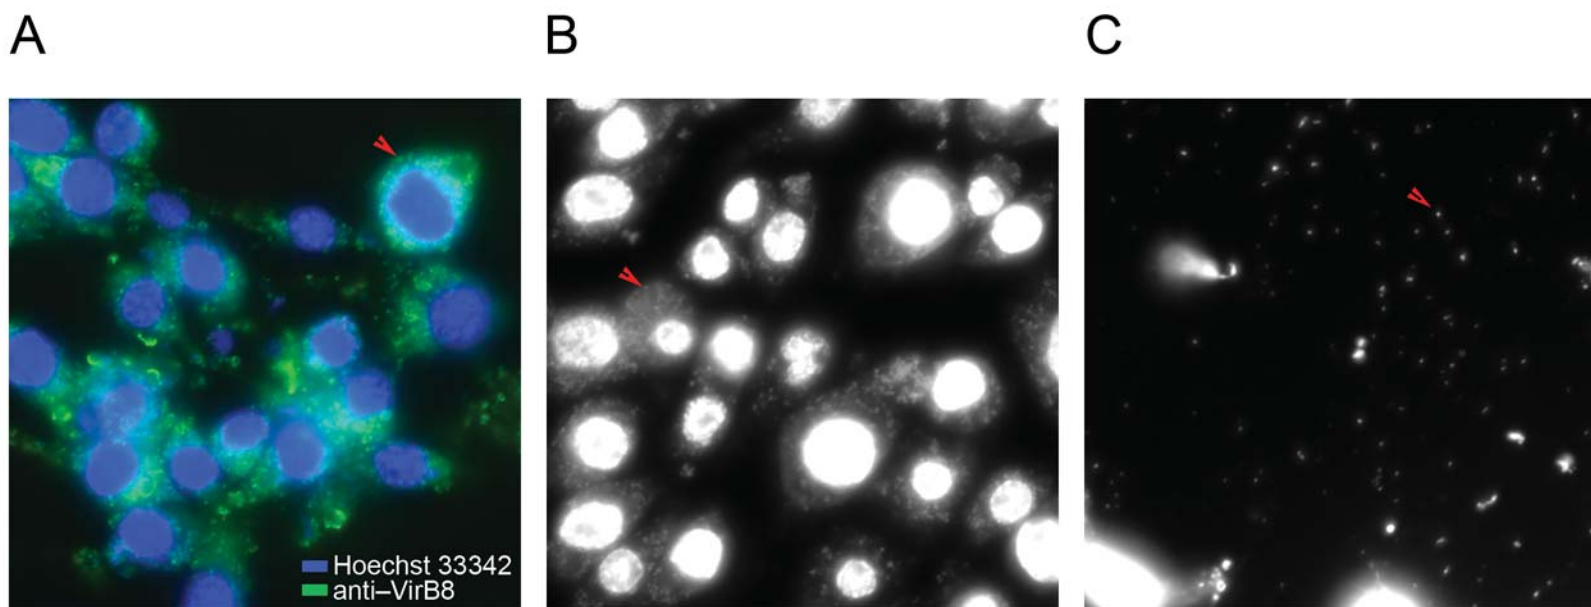

Figure 1

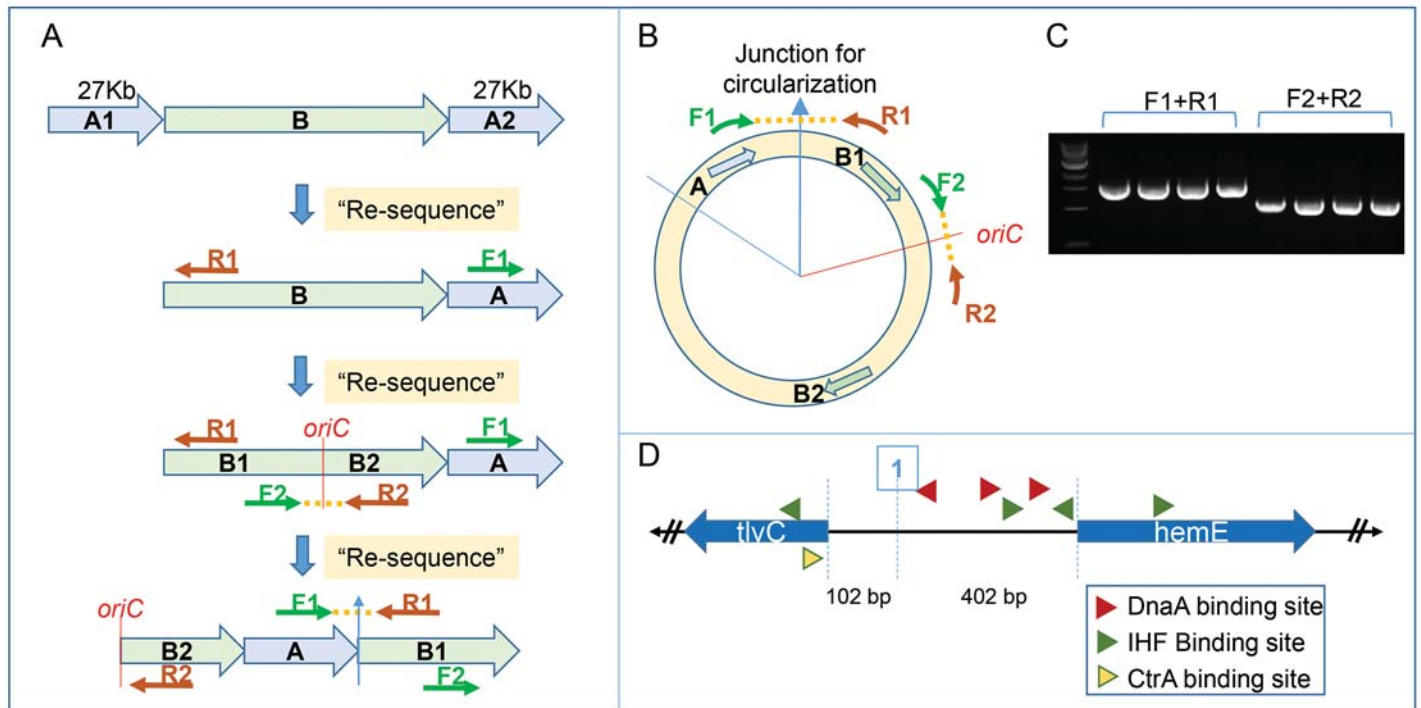

Figure 2

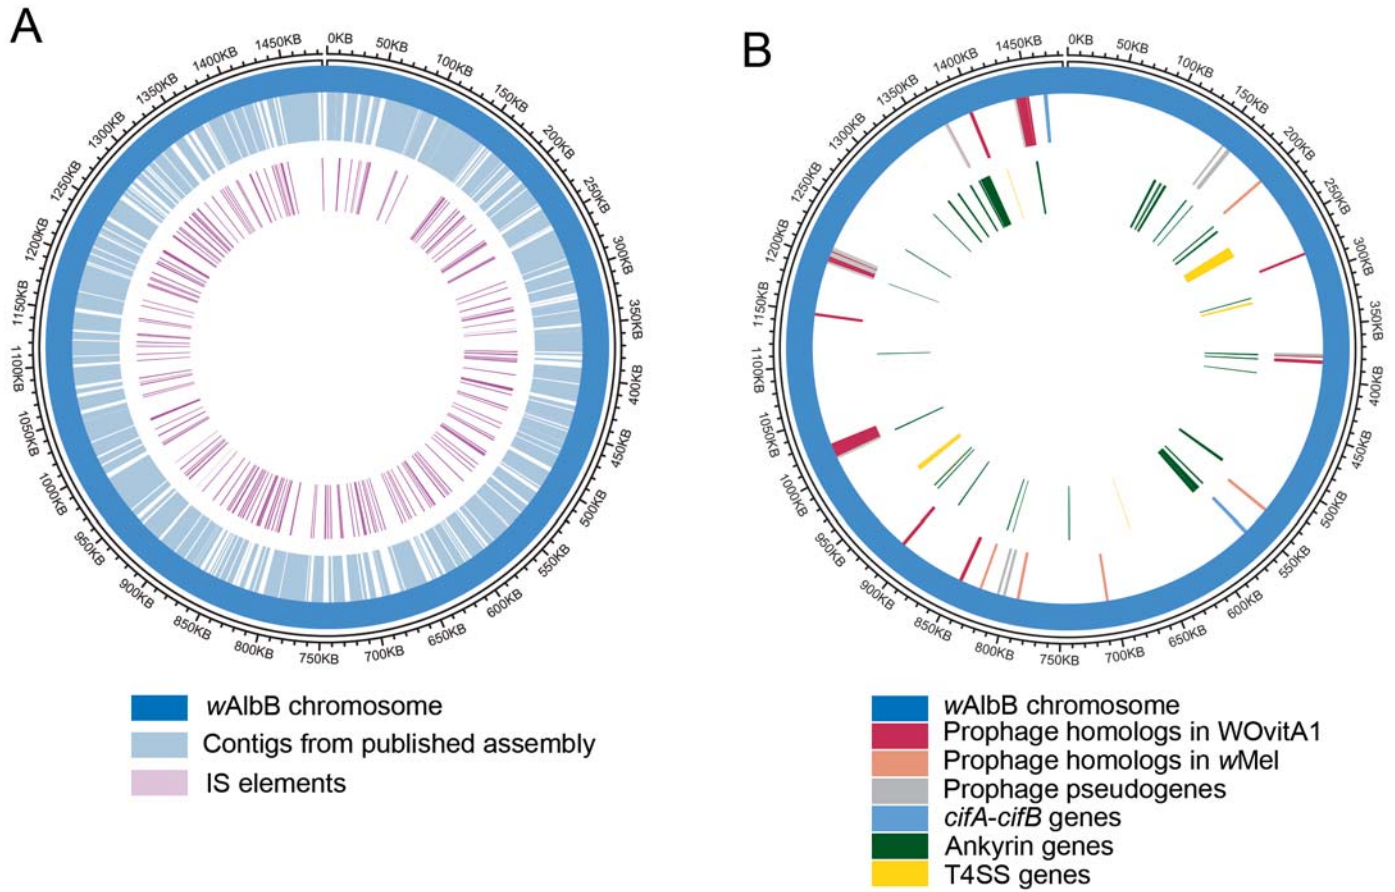

Figure 3



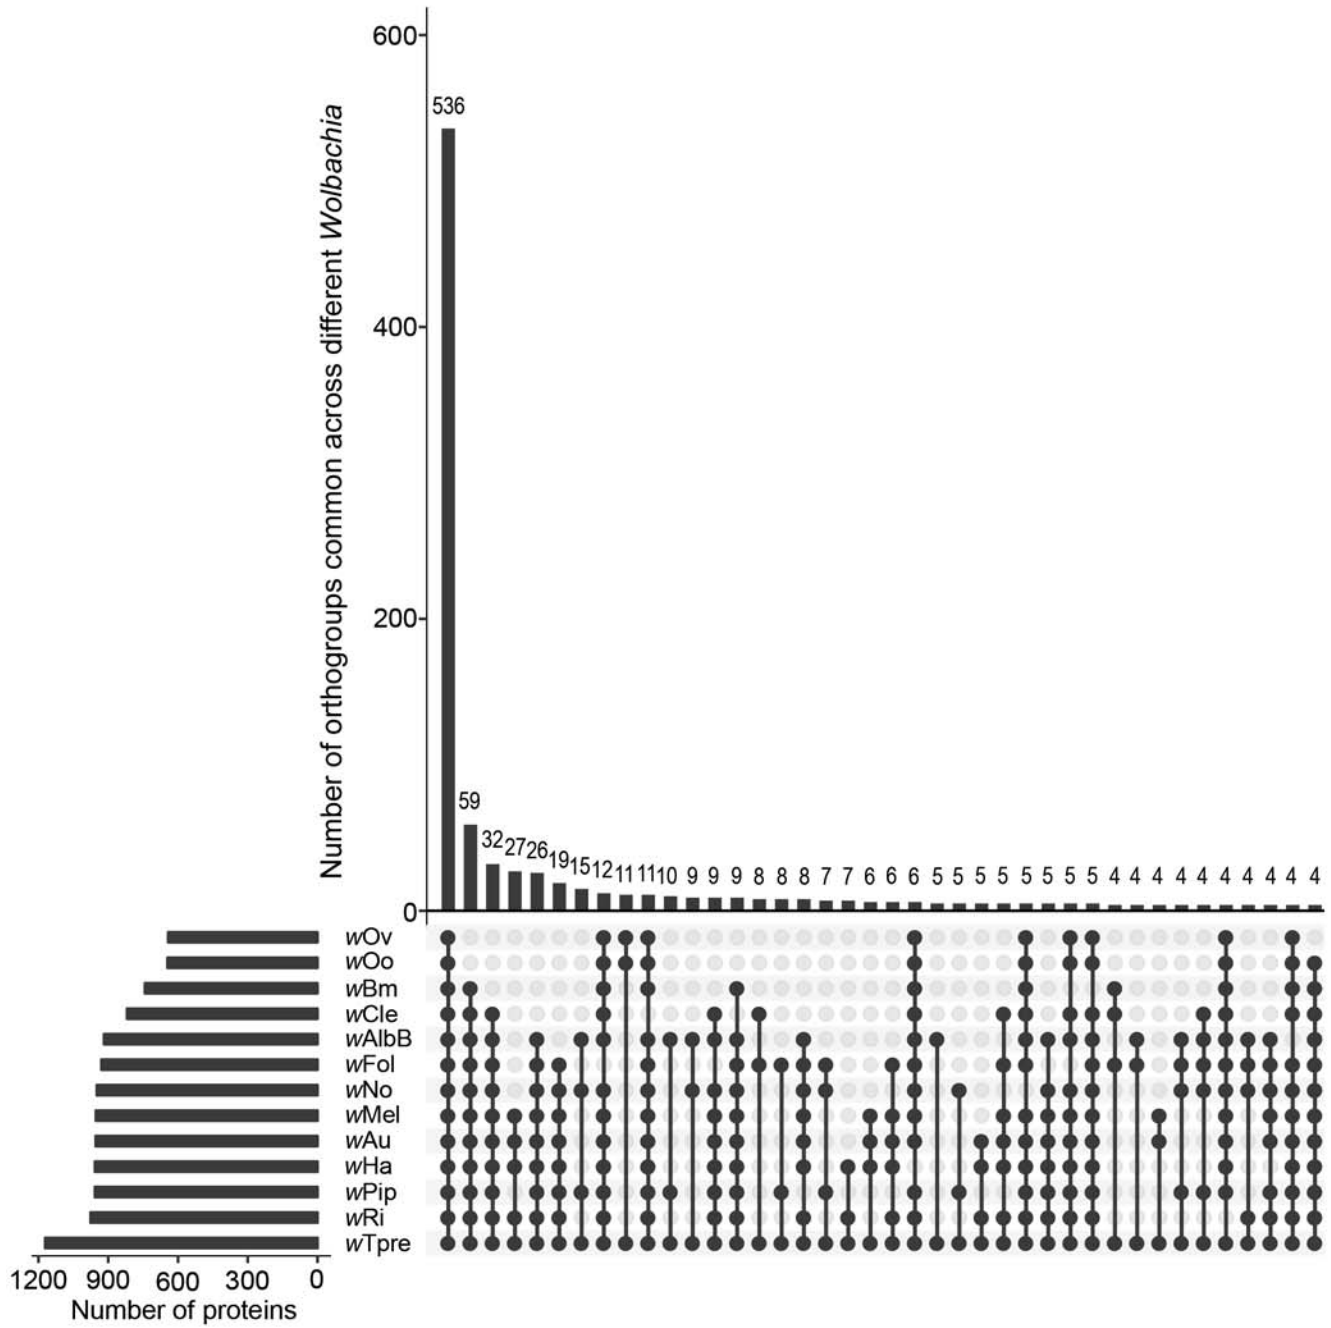

Figure 4

**Table 1. Key characteristics of all complete *Wolbachia* genomes**

| Name   | Host organism                            | Supergroup | RefSeq assembly accession    | Size (Mb) | GC%  | Proteins | rRNA | tRNA | Other RNA | Total Genes | Pseudogenes (%) | Ankyrin proteins | BUSCO score |
|--------|------------------------------------------|------------|------------------------------|-----------|------|----------|------|------|-----------|-------------|-----------------|------------------|-------------|
| w Au   | <i>Drosophila simulans</i>               | A          | GCF_000953315.1              | 1.26      | 35.2 | 1,099    | 3    | 34   | 4         | 1,265       | 125 (9.9)       | 21               | 83.8        |
| w Ha   | <i>Drosophila simulans</i>               | A          | GCF_000376605.1              | 1.29      | 35.3 | 1,126    | 3    | 35   | 4         | 1,263       | 95 (7.5)        | 26               | 83.3        |
| w Mel  | <i>Drosophila melanogaster</i>           | A          | GCF_000008025.1              | 1.27      | 35.2 | 1,100    | 3    | 34   | 4         | 1,270       | 129 (10.2)      | 19               | 82.9        |
| w Ri   | <i>Drosophila simulans</i>               | A          | GCF_000022285.1              | 1.45      | 35.2 | 1,254    | 3    | 34   | 4         | 1,403       | 108 (7.7)       | 25               | 83.3        |
| w AlbB | <i>Aedes albopictus</i> (Aa23 cell line) | B          | GenBank Accession = CP031221 | 1.48      | 34.4 | 1,205    | 3    | 34   | 4         | 1,434       | 188 (13.1)      | 34               | 81.9        |
| w No   | <i>Drosophila simulans</i>               | B          | GCF_000376585.1              | 1.30      | 34.0 | 1,065    | 3    | 34   | 4         | 1,231       | 125 (10.2)      | 41               | 82.4        |
| w Pip  | <i>Culex quinquefasciatus</i>            | B          | GCF_000073005.1              | 1.48      | 34.2 | 1,257    | 3    | 34   | 4         | 1,402       | 104 (7.4)       | 43               | 81.9        |
| w Tpre | <i>Trichogramma pretiosum</i>            | B          | GCF_001439985.1              | 1.13      | 33.9 | 827      | 3    | 35   | 4         | 1,106       | 237 (21.4)      | 10               | 82.4        |
| w Oo   | <i>Onchocerca ochengi</i>                | C          | GCF_000306885.1              | 0.96      | 32.1 | 651      | 3    | 34   | 4         | 759         | 67 (8.8)        | 1                | 74.7        |
| w Ov   | <i>Onchocerca volvulus</i>               | C          | GCF_000530755.1              | 0.96      | 32.1 | 649      | 3    | 34   | 4         | 763         | 73 (9.6)        | 1                | 75.6        |
| w Bm   | <i>Brugia malayi</i>                     | D          | GCF_000008385.1              | 1.08      | 34.2 | 839      | 3    | 34   | 4         | 1,047       | 167 (16.0)      | 12               | 80.6        |
| w Fol  | <i>Folsomia candida</i>                  | E          | GCF_001931755.1              | 1.80      | 34.8 | 1,513    | 3    | 35   | 4         | 1,658       | 103 (6.2)       | 83               | 81.0        |
| w Cle  | <i>Cimex lectularius</i>                 | F          | GCF_000829315.1              | 1.25      | 36.3 | 981      | 3    | 34   | 4         | 1,246       | 224 (18.0)      | 33               | 80.6        |

Note. - For a standardized analysis across all genomes, the number of ankyrin proteins in each genome was determined in this study, using an identical pipeline based on Pfam domain annotations. Similarly, the BUSCO scores (reported as % complete BUSCOs) for each of the genomes was also calculated using identical parameters (-lineage = proteobacteria\_odb9, 221 BUSCO groups). The other genome characteristics were obtained from the RefSeq database using the accession numbers indicated.

**Table 2. KAAS server based KEGG annotations identifies five genes missing in *w* AlbB**

|      | <i>w</i> Mel | <i>w</i> Ri        | <i>w</i> Ha       | <i>w</i> No       | <i>w</i> Pip | <i>w</i> Bm     | <i>w</i> Oo       | <i>w</i> Cle        |
|------|--------------|--------------------|-------------------|-------------------|--------------|-----------------|-------------------|---------------------|
| DgkA | WD_1163      | <i>w</i> Ri_011390 | <i>w</i> Ha_09720 | <i>w</i> No_07140 | WP0909       | NA              | NA                | NA                  |
| MPG  | WD_1110      | <i>w</i> Ri_012850 | <i>w</i> Ha_09290 | <i>w</i> No_05480 | WP0867       | <i>w</i> Bm0254 | <i>w</i> Oo_04680 | <i>w</i> CLE_011920 |
| CydA | WD_0740      | <i>w</i> Ri_007360 | <i>w</i> Ha_06280 | NA                | NA           | NA              | NA                | NA                  |
| CydB | WD_0741      | <i>w</i> Ri_007350 | <i>w</i> Ha_06290 | NA                | NA           | NA              | NA                | NA                  |
| FtsI | WD_1273      | <i>w</i> Ri_012430 | <i>w</i> Ha_10600 | NA                | NA           | NA              | NA                | <i>w</i> CLE_010110 |

Note. - Missing genes were identified by comparing *w* AlbB KEGG annotations to *w* Pip and *w* Ri annotations at the KAAS server. Corresponding orthologs were then identified in other *Wolbachia* annotations available on the KAAS server.

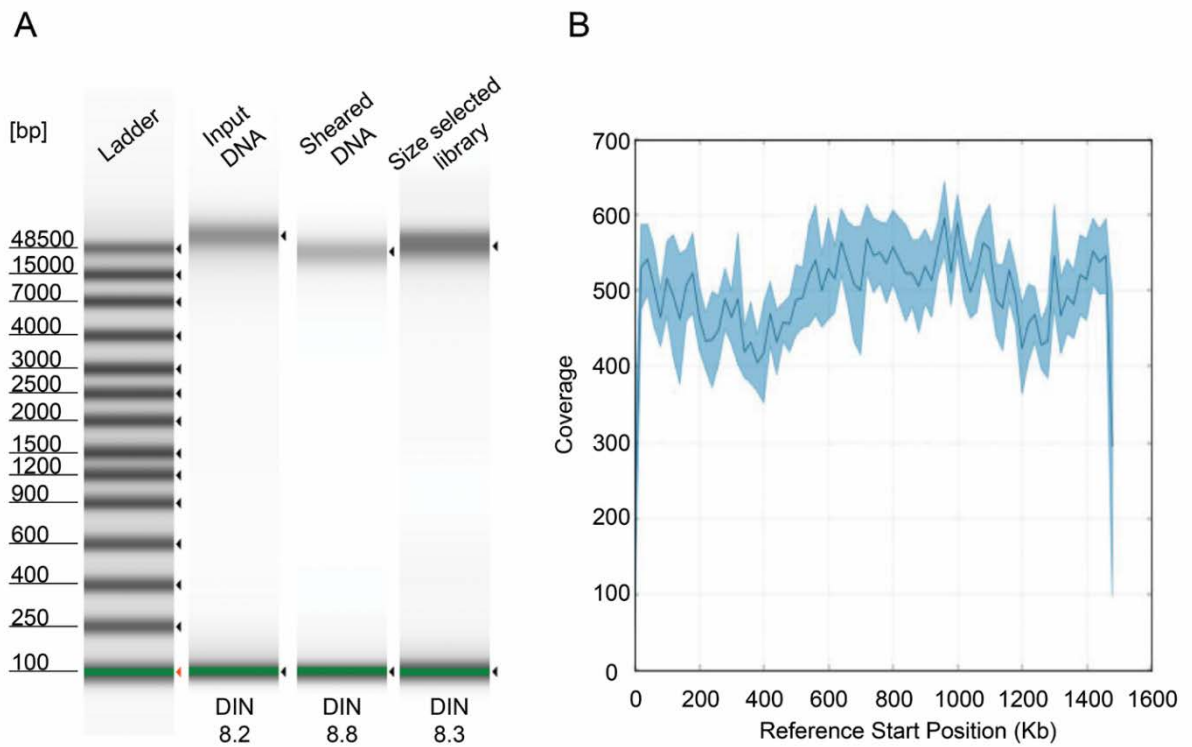

**Fig. S1. PacBio library containing large inserts yields wAlbB draft contig with ~500X coverage.** (A) Gel image of genomic wAlbB DNA and PacBio library analyzed using the Agilent 4200 TapeStation system. (B) Coverage report of wAlbB draft contig produced by first round of PacBio HGAP3 assembly.

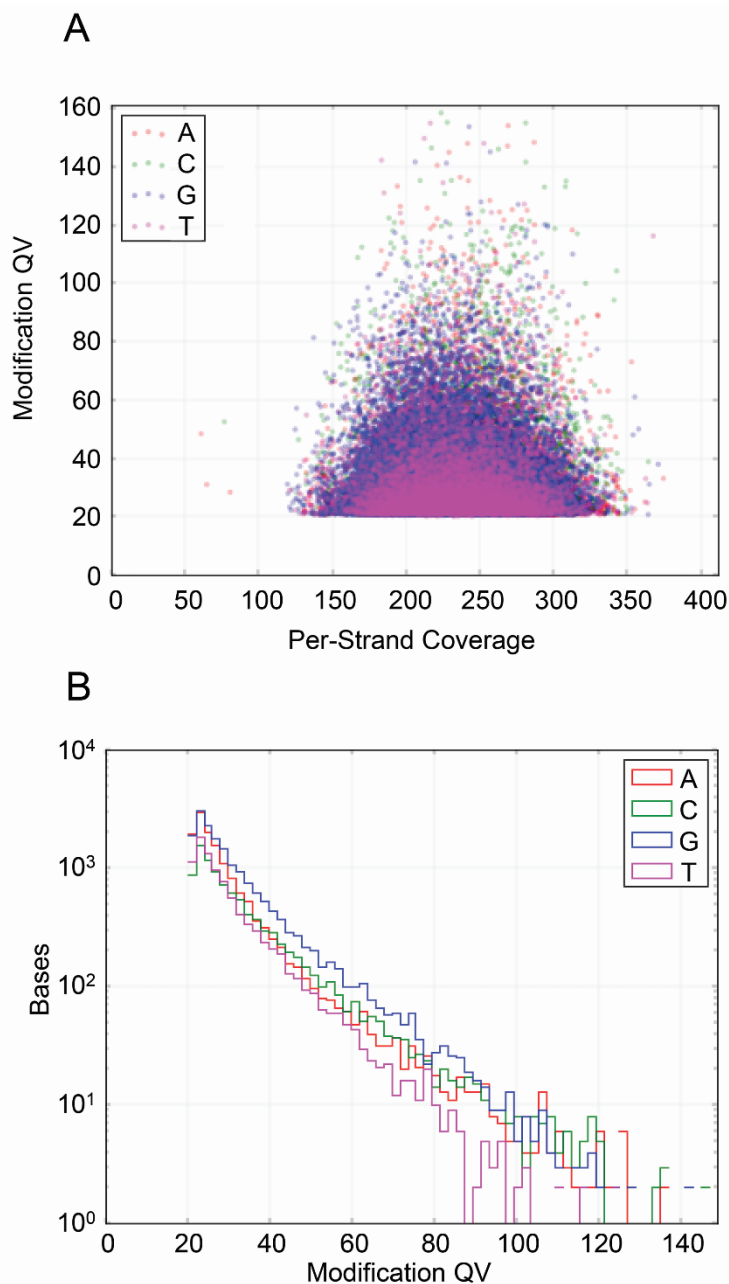

**Fig. S2. No detectable DNA methylation in *wAlbB* genome.** Using the PacBio RS\_Modificaton\_and\_Motif\_Analysis.1 pipeline, no robust signal for DNA modifications such as m6A and m4C in *wAlbB* genome were detected. (A) The “Modification QV” quality scores for each of the 4 bases A, C, G and T were almost normally distributed over the entire coverage range, unlike genuine modifications where the scores increase lineary with coverage (See <https://github.com/PacificBiosciences/Bioinformatics-Training/wiki/Methylome-Analysis-Technical-Note>)

### BUSCO Assessment Results

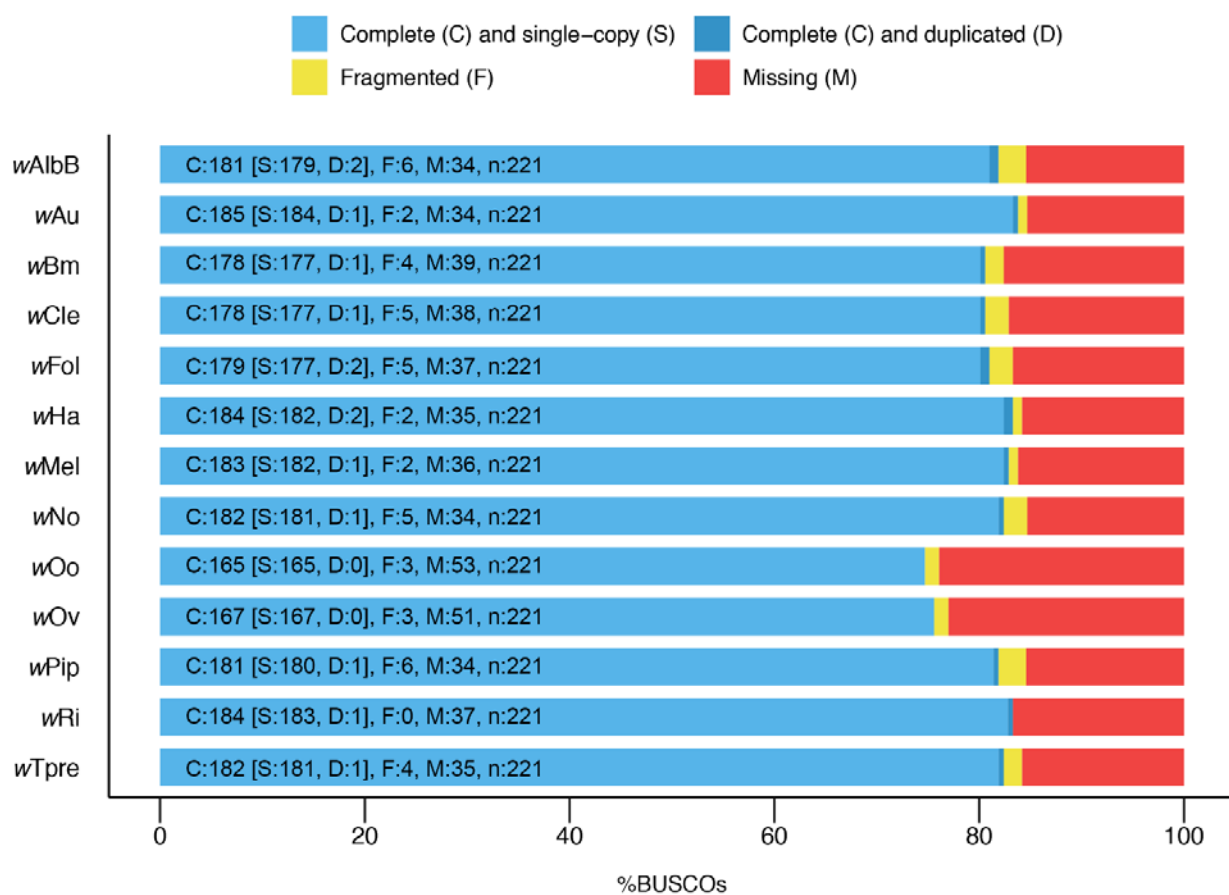

Fig. S3. **Similar BUSCO scores across all the complete *Wolbachia* genomes.** The BUSCO pipeline was used to measure the proportion of highly conserved, single-copy orthologs (BUSCO groups). The set of reference BUSCO groups was set to the lineage “Proteobacteria”, which contains 221 BUSCOs derived from 1,520 proteobacterial species.
